# Influenza A (N1-N9) and Influenza B (B/Vic and B/Yam) Neuraminidase Pseudotypes as Tools for Pandemic Preparedness and Improved Influenza Vaccine design

Kelly A.S. da Costa<sup>1,†</sup>, Joanne Marie M. Del Rosario<sup>1,2,3,†</sup>, Matteo Ferrari<sup>3,4</sup>, Sneha Vishwanath<sup>4</sup>, Benedikt Asbach<sup>5</sup>, Rebecca Kinsley<sup>3,4</sup>, Ralf Wagner<sup>5,6</sup>, Jonathan L. Heeney<sup>3,4</sup>, George W. Carnell<sup>4</sup> and Nigel J. Temperton<sup>1,3,\*</sup>

<sup>1</sup> Viral Pseudotype Unit, Medway School of Pharmacy, The Universities of Greenwich and Kent at Medway, Chatham, United Kingdom

<sup>2</sup> Department of Physical Sciences and Mathematics, College of Arts and Sciences, University of the Philippines Manila, Manila, Philippines

<sup>3</sup> DIOSynVax, Cambridge, United Kingdom

<sup>4</sup> Department of Veterinary Medicine, University of Cambridge, Cambridge, United Kingdom

<sup>5</sup> Institute of Medical Microbiology and Hygiene, University of Regensburg, Regensburg, Germany

<sup>6</sup> Institute of Clinical Microbiology and Hygiene, University Hospital Regensburg, Regensburg, Germany

<sup>†</sup> Authors contributed equally to this work and share first authorship.

## \* Correspondence:

Dr Nigel Temperton

n.temperton@kent.ac.uk; orcid id: <https://orcid.org/0000-0002-7978-3815>

20

**Abstract:** To better understand how inhibition of the influenza neuraminidase (NA) protein contributes to protection against influenza, and to investigate its breadth and cross-neutralizing activity, we have produced lentiviral vectors pseudotyped with an avian H11 hemagglutinin (HA) and the NA (N1- N9) of all influenza A and (B/Victoria and B/Yamagata) influenza B subtypes. These NA viral pseudotypes (PV) possess stable NA activity and can be utilized as target antigens in *in vitro* assays to assess vaccine immunogenicity. Employing these NA PV, we have developed an enzyme-linked lectin assay (pELLA) for routine serology to measure neuraminidase inhibition (NI) titers of reference antisera, monoclonal antibodies, and post-vaccination sera with various influenza antigens. We have also shown that pELLA is more sensitive than the commercially available NA-Fluor™ in detecting NA inhibition in these samples. Our studies may lead to establishing the protective NA titer that contributes to NA-based immunity. This will aid in the design of superior, longer lasting, and more broadly protective vaccines that can be employed together with HA-targeted vaccines in a pre-pandemic approach.

**Keywords:** influenza; neuraminidase; pseudotype; ELLA; vaccine; monoclonal antibody; antisera; inhibition

36

37

38

39

40

## 1. Introduction

42 Influenza virions display two major surface glycoproteins, hemagglutinin (HA) and neuraminidase (NA)  
43 that play crucial roles in influenza infection and immunity. HA is involved in viral entry and NA in viral release  
44 (1–3). Currently available Influenza A (IAV) and Influenza B (IBV) vaccines mainly target HA, however, HA is  
45 subject to constant antigenic drift at distinct epitopes in its exposed globular head domain (4–6). As a  
46 result, seasonal influenza vaccines are reformulated annually to provide up to date protection.

47 Neuraminidase is a tetramer formed of separate subunits consisting of a head and stalk region, similar to  
48 the HA proteins (7). NA has known enzymatic activity which enables it to cleave sialic acid from cellular  
49 and viral glycoproteins expressed in infected cells (7). Sialic acids (SA) are typically found at the terminals  
50 of oligosaccharides on gangliosides and glycoproteins. SA are mainly linked to galactose residues by  
51  $\alpha$ -2,3 linkages, most commonly found in avian species, or  $\alpha$ -2,6-linkages, mainly found in humans and other  
52 mammals (8). NA cleaves  $\alpha$ -2,3 linked sialic acids more efficiently than  $\alpha$ -2,6 sialic acids indicating that  
53 influenza NA is more specialized to avian infection (9,10). However, studies have shown that  $\alpha$ -2,6 activity  
54 increases over time (11), which in combination with changes to HA may allow avian influenza strains to  
55 ‘species jump’ and potentially cause a pandemic in humans (12). Aside from its enzymatic activity, NA is  
56 vital in preventing the aggregation of viral progeny (13), enables penetration of human mucus by freeing  
57 virus from sialylated host mucins (2) and also facilitates viral budding (14). Neuraminidase (NA) is subject to  
58 antigenic changes, although at a lower rate than HA (15–17).

59 Neuraminidase has been a successful target for antiviral drugs and is currently being studied as an  
60 alternative or adjunct to HA as a viable vaccine candidate with the potential to be employed as part of a  
61 ‘universal’ or ‘cross subtype’ influenza vaccine (18–20). The ultimate goal of a universal vaccine is to protect  
62 against infection from novel influenza viruses bearing combinations of H1-H18 and N1-N11. However, this is  
63 a highly ambitious undertaking and consensus within the field is that influenza vaccines with approximately  
64 75% protection against influenza A and B viruses that can protect for at least 12 months across a range of  
65 age groups and socio-economic backgrounds is considered an achievable interim aim (21). There are 144  
66 possible combinations of NA and HA subtypes for non-bat IAV and 120 combinations have been observed in  
67 nature (22,23). Studies have shown that anti-NA antibodies raised following immunization with N1 (H1  
68 subtype) can inhibit homologous and heterosubtypic influenza A viruses (e.g. H5N1, H3N2 & H7N9) (24)  
69 and are successful in controlling influenza infection *in vivo* (25). It is also of note that currently licensed  
70 inactivated influenza vaccines do contain NA and the quality and stability of NA in these preparations has  
71 not been fully investigated (26). It is known that the anti-NA seroconversion rate of individuals immunized  
72 with inactivated trivalent vaccine is variable (27–29) and this could potentially be increased by considering  
73 NA as an immunogen during vaccine formulation.

74 Antibodies directed to NA do not block viral entry and are therefore not classified as classically  
75 neutralizing antibodies (30). Traditionally, the inhibition of NA enzymatic activity has been measured using a  
76 MUNANA substrate-based assay (31,32), however this assay utilizes hazardous chemicals making it  
77 unsuitable for high throughput serological testing. Therefore, alternatives assays such as the Enzyme  
78 Linked- Lectin Assay (ELLA) (33–36) and fluorescence-linked MUNANA based assays (e.g. NA-star/NA  
79 Fluor™) have been developed to quantify NA enzymatic activity as a measure of antibody mediated  
80 inhibition of viral egress from infected cells (37). These methods make the study of NA activity more  
81 accessible for the design of the next generation of influenza vaccines. Additionally, pseudotype virus (PV)  
82 can also be used as a substitute to wild type virus in these assays. Neuraminidase pseudotyped viruses  
83 have already been successfully used in place of reassortant virus or Triton X-treated wild type virus in the  
84 ELLA assay for N1 and N2 subtypes (38,39) As NA has the potential to be included in a more broadly

85 protective vaccine approach, a toolbox of assays capable of assessing NA inhibition will be required. To this  
86 end, we have produced an NA PV library encompassing IAV N1-N11 and IBV from the Victoria-like (B/Vic)  
87 and Yamagata-like (B/Yam) lineages for use in the pELLA assay and potentially the NA-Fluor™ assay. We  
88 demonstrate that these PV can be effectively employed in the pELLA to assess NA inhibition of reference  
89 anti-NA antisera, monoclonal antibodies (mAb), and anti-NA antibodies generated through vaccination,  
90 without the requirement for containment higher than BSL 2.

## 91 **2. Materials and Methods**

### 92 **2.1 Production and transformation of plasmids**

93 Neuraminidase genes from IAV subtypes N1-N9 and IBV, B/Vic, and B/Yam, were gene-optimized and  
94 adapted to human codon use via the GeneOptimizer algorithm (40). These NA genes were cloned into  
95 pEVAC (GeneArt, Germany) via restriction digestion. Plasmids were transformed via heat-shock in  
96 chemically induced competent *E. coli* DH5 $\alpha$  cells (Invitrogen 18265-017). Plasmid DNA was extracted from  
97 transformed bacterial cultures via the Plasmid Mini Kit (Qiagen 12125). All plasmids were subsequently  
98 quantified using UV spectrophotometry (NanoDrop™ -Thermo Scientific).

99

### 100 **2.2 Production of influenza H11-NA(X) pseudotypes (PV)**

101 For production of H11-NA(X) PV, human embryonic kidney 293T/17 (HEK293T/17, ATCC:  
102 CRL-11268<sup>a</sup>) were maintained in complete medium, (Dulbecco's Modified Essential Medium (DMEM)  
103 (PANBiotech P04-04510) with high glucose and GlutaMAX supplemented with 10% (v/v) heat-inactivated  
104 Fetal Bovine Serum (PANBiotech P30-8500), and 1% (v/v) Penicillin-Streptomycin (PenStrep) (Sigma  
105 P4333) at 37°C and 5% CO<sub>2</sub>. Transfection was done as previously described (41). On the day prior to  
106 transfection, 4x10<sup>5</sup> HEK293T/17 cells in complete DMEM were seeded per well of a 6-well plate. The next  
107 day, media was replaced, and cells were transfected using FuGENE® HD Transfection Reagent (Promega  
108 E2312) in Opti-MEM™ (Thermo Fisher Scientific 31985062) with the following plasmids: 10 ng NA encoding  
109 plasmid (pEVAC), 10 ng H11 encoding plasmid (A/red shoveler/Chile/C14653/2016 (H11) (pEVAC), 5 ng  
110 transmembrane serine protease 4 (TMPRSS4) encoding plasmid, 375 ng luciferase vector plasmid  
111 (pCSFLW), and 250 ng p8.91 gag-pol (Gag-Pol expression plasmid. For the H5 release assay, 10 ng  
112 A/Indonesia/5/2005(H5) (pI.18) was included in the plasmid DNA mixture replacing H11 (pEVAC), and  
113 TMPRSS4 was not utilized. All plasmid DNA were combined in 100  $\mu$ L OptiMEM™, and FuGENE® HD (3  
114  $\mu$ L per  $\mu$ g plasmid DNA) was added dropwise followed by incubation for 15 minutes. The plasmid  
115 DNA-OptiMEM™ mixture was then added to the cells with constant swirling. Plates were incubated at  
116 37°C, 5% CO<sub>2</sub> for 48 hours. Supernatants were then collected, passed through a 0.45  $\mu$ m filter, and stored  
117 at -80°C.

118

### 119 **2.3 H5 release assay**

120 The ability of different NA to release H5 HA PV from producer cells was assessed by titration of the  
121 H5-NA(X) pseudotyped viruses produced as above in HEK293T/17 cells. Titration experiments were  
122 performed in Nunc F96 MicroWell white opaque polystyrene plates (Thermo Fisher Scientific 136101).  
123 Briefly, 50  $\mu$ L of viral supernatant were serially diluted two-fold down columns of a 96-well plate in duplicate  
124 before adding 50  $\mu$ L of 1x10<sup>4</sup> HEK293T/17 cells to each well. No PV/cell only negative controls were  
125 included on each plate as an indirect cell viability measurement. Plates were then incubated at 37°C, 5%  
126 CO<sub>2</sub> for 48 hours. Media was then removed and 25  $\mu$ L Bright-Glo® luciferase assay substrate was added

127 to each well. Titration plates were then read using the GloMax® Navigator (Promega) and the Promega  
128 GloMax® Luminescence Quick-Read protocol. Viral pseudotype titer was then determined as Relative  
129 Luminescence Units/mL (RLU/mL).

130

## 131 2.4 Reference antisera, monoclonal antibodies, and serum samples

132 Reference antisera to assess the inhibition sensitivity of representative IAV, anti-N1  
133 A/California/7/2009 (NIBSC 10/218), anti-N1 A/turkey/Turkey/1/2005 (N1) (NIBSC 08/126), anti-N2  
134 A/Victoria/361/2011 (NIBSC 14/144), and anti-N2 A/South Australia/34/2019 (NIBSC 19/320) antisera, and  
135 IBV, NA antiserum prepared from B/Malaysia/2506/2004 (NIBSC 05/252), and NA antiserum prepared from  
136 B/Florida/4/2006 (09/316), were obtained from the National Institute for Biological Standards and Control  
137 (NIBSC). Monoclonal antibodies against N1, 3A2, 1H5, 4E9, and 3H10 (42), as well as CD6 (43) and  
138 CR9114 (44) were also utilized in neuraminidase inhibition assays. Post-vaccination mouse sera were  
139 obtained from the University of Cambridge as part of an ongoing influenza vaccination study and were  
140 employed to determine responses of different NA antigens used for vaccination against corresponding  
141 H11\_NA(X) pseudotypes.

142

## 143 2.5 Titration of NA PV via Enzyme Linked Lectin Assay (pELLA)

144

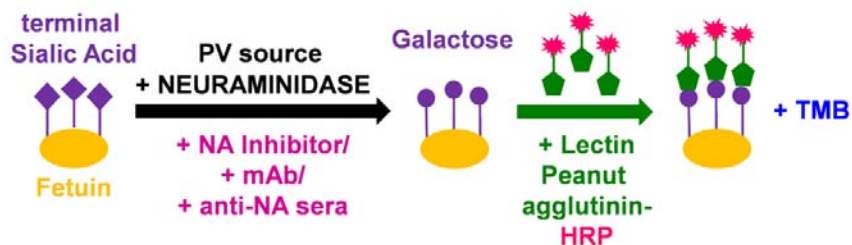

145

146 **Figure 1. Cartoon illustrating main reactions in the pseudotype virus enzyme linked lectin assay**  
147 **(pELLA).** The substrate fetuin is coated on each well of a 96-well plate. Neuraminidase, added via the  
148 NA PV we have generated, then cleaves the terminal sialic acid (SA) residues of the substrate fetuin giving  
149 rise to galactose residues. In the presence of substances that can impede NA such as mAbs and anti-NA  
150 antisera, the action of neuraminidase is inhibited and this can then be measured indirectly via pELLA. The  
151 terminal galactose residues that are present due to the action of neuraminidase are then specifically  
152 recognized by the substrate lectin peanut agglutinin conjugated to horseradish peroxidase (HRP). Addition  
153 of a peroxidase substrate such as TMB results in a detectable color change that can be measured at OD<sub>450</sub>.

154

155 Clear Nunc Maxisorp™ flat-bottom 96-well plates (Thermo Fisher 44-2404-21) were coated overnight  
156 at 4°C with 100 µL per well of 25 µg/mL fetuin (Sigma F3385) in 1X KPL coating buffer (Sera Care 50-84-00)  
157 to assess H11\_NA(X) PV neuraminidase activity via pELLA (**Figure 1**). The next day, plates were washed  
158 three times with wash buffer (WB) (0.5% (v/v) Tween-20 in PBS). Two hundred forty µL of H11\_NA(X) PV  
159 was serially diluted two-fold from neat to 1:2048 with sample diluent (SD) (1% (w/v) Bovine Serum Albumin  
160 (BSA), 0.5% (v/v) Tween-20 in PBS) across a row of a 96-well mixing plate. Fifty µL of the PV dilutions  
161 were then transferred to two rows until column 10 of the fetuin-coated 96-well plate, with columns 11 and 12  
162 containing only SD (no PV control). All wells were then added with 50 µL SD. Plates were incubated

163 overnight at 37°C. The next day, plates were washed 6 times with WB. One hundred µL of conjugate (1  
164 µg/mL lectin from *Arachis hypogaea* (peanut) peroxidase conjugate (Sigma L7759) in conjugate diluent (1%  
165 (w/v) BSA in PBS)) was added to all wells and plates were incubated at room temperature for 2 hours with  
166 shaking (225 rpm). Plates were then washed 3 times with WB before adding 100 µL 1-Step™ Ultra  
167 TMB-ELISA Substrate Solution (Thermo Fisher 34029) followed by incubation in the dark at room  
168 temperature with shaking (225 rpm) for 10 minutes. Reaction was stopped by addition of 100 µL 0.1 M  
169 H<sub>2</sub>SO<sub>4</sub> per well. Optical density at 450 nm (OD<sub>450</sub>) was determined using the Tecan Sunrise™ microplate  
170 reader with Magellan™ data analysis software. Readings were normalized to 100% and 0% OD<sub>450</sub>, and  
171 the dilution that resulted in 90% OD<sub>450</sub> was selected as the PV dilution input for inhibition assays.

172

## 173 **2.6 Inhibition of NA PV by antisera and mAbs**

174 The inhibition of neuraminidase activity by standard reference antisera, monoclonal antibodies (mAb),  
175 and serum samples from animal studies was evaluated via pELLA. Reference antisera were initially diluted  
176 1:10 and then serially diluted five-fold; monoclonal antibody concentrations used were in the range of 32  
177 µg/mL to 0.5 ng/mL. Serum samples from animal immunization studies were initially diluted 1:20 and then  
178 serially diluted two-fold in 50 µL SD. Dilutions were done in duplicate across two rows of a 96-well mixing  
179 plate. Fifty microliters of these dilutions were then transferred to fetuin-coated plates as described above,  
180 up to Column 10. Fifty µL of the H11\_NA(X) PV that resulted in 90% OD<sub>450</sub> as determined above (**Section**  
181 **2.5**) was then transferred to all wells of the fetuin-coated plate except for Column 11 which served as the PV  
182 only control (0% inhibition) and column 12 contained SD only (100% inhibition). An additional 50 µL and  
183 100 µL of SD was added to columns 11, and 12, respectively. All other steps were followed as per pELLA  
184 titration (**Section 2.5**). The IC<sub>50</sub> was calculated as the inverse dilution of serum or antibody concentration  
185 that resulted in 50% inhibition of NA activity as determined via GraphPad Prism 9.0.

186

## 187 **2.7 Flow Cytometry Binding Assay.**

188 HEK293T/17 cells were transfected with pEVAC encoding representative NA sequences of N1, N2, N3,  
189 N4, N8, and N9, as per PV production (**Section 2.2**). Forty-eight hours post-transfection, cells (50,000  
190 cells/well) were transferred into V-bottom 96-well plates. Cells were then incubated with mouse sera  
191 (**Section 2.4**) (diluted 1:50 in PBS) for 30 minutes, washed with Fluorescence-activated cell sorting (FACS)  
192 buffer (PBS, 1% (v/v) FBS, 0.02% (v/v) Tween 20), and stained with goat anti-mouse IgG (H+L) Alexa Fluor  
193 647 Secondary Antibody (Thermo Fisher A-21235) diluted at 20 µg/mL in FACS buffer, for 30 minutes in the  
194 dark. Cells were washed with FACS buffer and samples were run on the Attune NxT Flow Cytometer  
195 (Invitrogen) with a high throughput autosampler. Dead cells were excluded from the analysis by staining  
196 cells with 7-Aminoactinomycin D (7-AAD) and gating 7-AAD negative cells.

197

## 198 **2.8 NA-Fluor™ Influenza Neuraminidase Assay.**

199 The NA activity of the H11-NA(X) PV was determined via the NA-Fluor™ Influenza Neuraminidase  
200 Assay (Life Technologies 4457091) kit. First, the linear range of fluorescence versus concentration of the  
201 Tecan Infinite 200Pro was determined by comparing relative fluorescence units (RFU) obtained from the NA  
202 activity assay of the PV to a standard curve of 4-Methylumbelliferone sodium salt 4-MU(SS) (Sigma M1508).  
203 NA activity is based on the production of 4-MU over time (60 minutes at 37 °C for the standard assay). The  
204 NA activity assay was then performed according to manufacturer's protocol. Briefly, H11-NA(X) PV was  
205 diluted 2-fold from neat in NA-Fluor 2X assay buffer in a black 96-well plate and incubated for 1 hour at 37°C



206 with the NA-Fluor substrate. After adding the stop solution, the plate was read at excitation and emission  
207 wavelengths of 355 nm and 460 nm, respectively, with an optimal gain of 55 using the Tecan Infinite 200Pro  
208 fluorescence plate reader. The RFU range for normalizing PV according to NA activity that is unique to  
209 every H11-NA(X) PV was then determined as well as the optimum H11-NA(X) PV dilution for the  
210 neuraminidase inhibition assay.

211 For the NA-Fluor™ Inhibition assay, the dilutions and concentrations for standard reference antisera,  
212 monoclonal antibodies (mAb), and serum samples from animal studies that were employed in the pELLA  
213 assay were likewise utilized (**Section 2.6**). The pre-determined amount of H11-NA(X) PV to test for  
214 inhibition of NA activity was then added. IC<sub>50</sub> values were determined from dose-response data using  
215 sigmoidal curve-fitting generated by GraphPad Prism Software 9.0.

216

## 217 **2.9 Statistical analyses.**

218 All statistical analyses were performed with GraphPad Prism 9 for Windows (GraphPad Software).

219

## 220 **2.10 Bioinformatic analysis.**

221 NA sequences for both IAV and IBV were downloaded from the Influenza Virus Resource database  
222 (IVRD) (fludb.org). Phylogenetic tree was generated using the Cyber-Infrastructure for Phylogenetic  
223 REsearch (CIPRES) Gateway (45). The resulting tree file was then visualized using the Archaeopteryx  
224 tree viewer in the Influenza Resource Database (IRD) (46).

225

## 226 **3. Results**

### 227 **3.1 NA PV production and functionality.**

228 Our NA PV library was constructed using the 4-plasmid transfection method as described previously  
229 (47) and encompasses NA IAV 1-11 and NA IBV from both B/Vic and B/Yam lineages (**Figure 2**,  
230 **Supplementary Table 1**). Similar to our HA PV library (47), p8.91 (48,49), a plasmid expressing the  
231 packaging genes (*gag-pol*) from a lentivirus (HIV) was used as the PV backbone. A pEVAC plasmid  
232 expressing the NA of the selected strain of IAV/IBV, pEVAC plasmid expressing hemagglutinin (HA) from  
233 A/red shoveler/Chile/C14653/2016 (H11), and a protease (transmembrane serine protease 4 (TMPRSS4))  
234 to cleave HA were also included (**Figure 2A**). Employing this protocol, we have successfully produced  
235 representative H11-NA(X) pseudotyped virus for all IAV subtypes and both IBV lineages (**Figure 2B-C**).

236 We then assessed the neuraminidase enzymatic activity of the pseudotypes we produced via our  
237 optimized PV Enzyme Linked Lectin Assay (pELLA) protocol (**Figure 1**). ELLA pseudotype titrations were  
238 performed to determine the dilutions of PV required for pELLA inhibition assays. The PV was diluted  
239 two-fold from a starting dilution of 1:2 to 1:1024 and optical density at 450 nm was read (**Figure 2C**). All  
240 values were normalized against the highest PV value obtained (100% OD<sub>450</sub>) and the sample diluent only  
241 control (0% OD<sub>450</sub>). Traditionally, 90% activity is optimal for use in the inhibition assay (33,39), however,  
242 we also set the additional criteria of the OD<sub>450</sub> to be a minimum of 2.0 for use in pELLA inhibition. All  
243 human and avian PV produced demonstrated NA enzymatic activity and met the additional criteria we set for  
244 use in pELLA inhibition (**Figure 2C**) apart from bat N10 and N11. These bat NA have been reported to not  
245 demonstrate any “classic” neuraminidase activity in these assays (50–54). We then utilized this PV library  
246 to test for anti-NA activity in post-vaccination mouse sera.

247

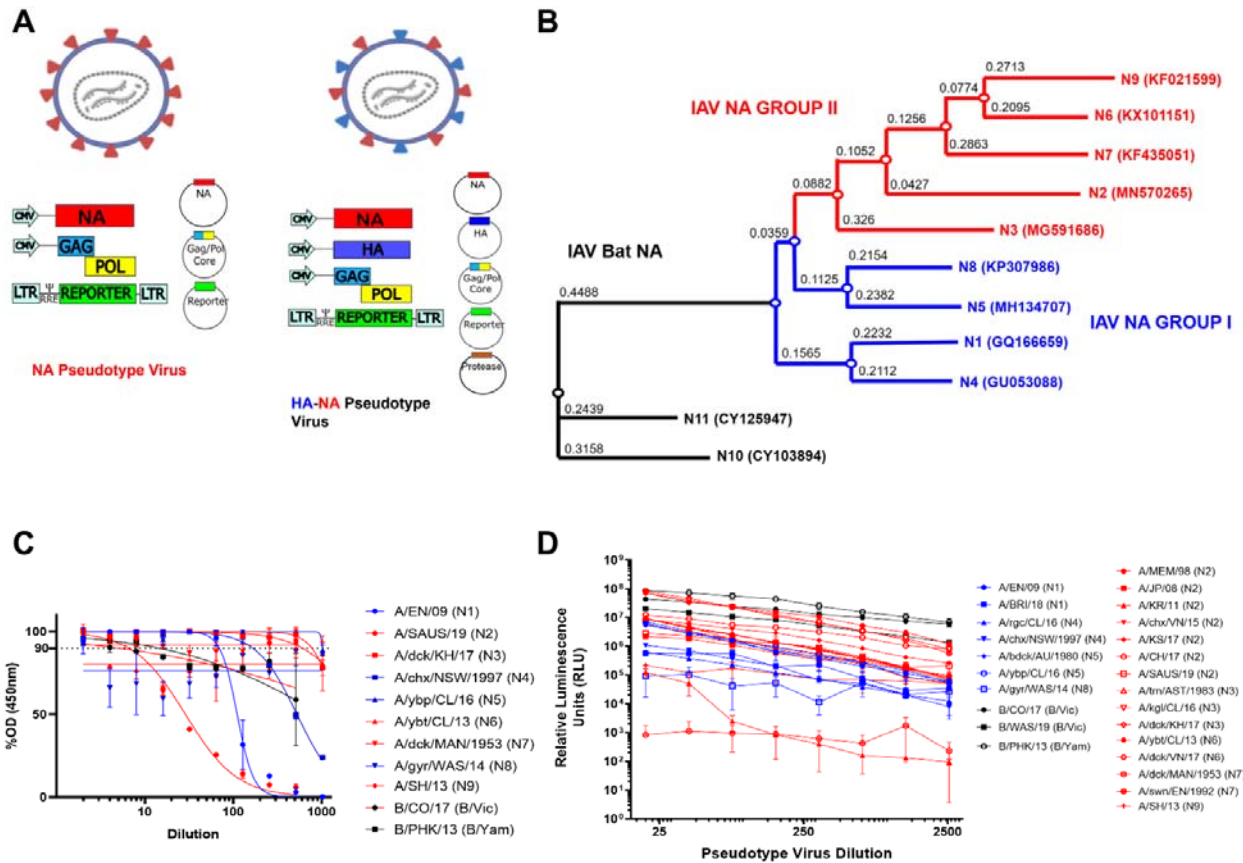

248

249 **Figure 2. H11\_NA(X) PV production and assessment of functionality. (A)** Schematic representation of  
 250 the production of influenza NA pseudotypes (PV) by quadruple plasmid transfection to produce pseudotypes  
 251 expressing NA only or HA and NA on the PV surface. Protease is only required when HA is expressed, as  
 252 per previous optimization (41). Images created using Biorender. **(B)** Phylogenetic tree of representative  
 253 IAV NA from the PV library constructed. Influenza A Group I NA PV are shown in blue and IAV Group II PV  
 254 in red. Accession numbers are reported with the subtype on the tree tips. Nodes are shown at the ends of  
 255 branches which represent sequences or hypothetical sequences at various points in evolutionary history.  
 256 Branch lengths indicate the extent of genetic change. The tree generated was constructed with PhyML on  
 257 the Influenza Research Database (IRD) (46) and graphically elaborated with Archaeopteryx.js **(C)** Titration  
 258 of Influenza A NA (1-9) and Influenza B NA (B/Victoria-like and B/Yamagata-like lineages) PV. Titration was  
 259 carried out via pELLA. Readout is NA enzymatic activity expressed as %OD (450nm) of highest dilution  
 260 tested. **(D)** Titration of Influenza A NA (1-9) and Influenza B NA (B/Victoria-like and B/Yamagata-like  
 261 lineages) PV expressing H5 (A/Indonesia/05/2005) hemagglutinin. Readout is expressed in relative  
 262 luminescence units (RLU). For **(C)** and **(D)**, each point represents the mean and standard deviation of two  
 263 replicates per dilution (n=2). Additionally, Influenza A (IAV) Group I NA PV are shown in blue (N1,  
 264 and N8), IAV Group II PV in red (N2, N3, N6, and N9), and influenza B NA PV (B/Victoria-like and  
 265 B/Yamagata-like lineages) are shown in black.

266

267 To assess the ability of our NA to release HA, we produced PV with IAV H5 and IAV NA (N1-N9) and  
268 IBV NA (B/Vic and B/Yam) in place of exogenous NA and titrated the PV via a luciferase reporter assay (41).  
269 N10 and N11 have previously been shown to not be required for HA release (41,55) and were therefore not  
270 tested herein. All the NA PV tested were capable of releasing H5 as evidenced by the titers observed  
271 (**Figure 2D**). H5 HA was selected as it is a highly pathogenic IAV subtype harboring a functional polybasic  
272 cleavage site that does not require an exogenous protease for HA release (56,57). Even though H5 has not  
273 been observed *in vivo* in combination with all NA subtypes utilized here, all PV produced RLU titers of  $10^5$   
274 and higher except for A/duck/MAN/1953 (N7) which data here suggests does not release H5 as efficiently  
275 (**Figure 2D**). Interestingly, one of the N2 PV constructed (A/Korea/KUMC\_GR570/2011) only achieved a  
276 production titer of  $10^5$ , reasons for these discrepancies are not clear.

277

### 278 **3.2 *In vitro* inhibition of NA pseudotypes by antisera and monoclonal antibodies**

279

280 The inhibition susceptibility of representative NA PV generated to available NA subtype specific  
281 reference antisera was tested. We have shown here dose response curves for PV which have previously  
282 infected humans: N1 (A/England/195/2009), N2 (A/South Australia/34/2019), B/Vic lineage NA  
283 (B/Colorado/6/2017) and B/Yam lineage NA (B/Phuket/3073/2013) (**Figure 3A**). All reference antisera  
284 were able to inhibit the PV they were tested against (**Figure 3A-B**) including both anti-N1 2009 pandemic  
285 antisera, A/California/7/09(H1N1), and antisera A/turkey/Turkey/05, originally from A/turkey/Turkey/1/05  
286 (H5N1), with  $IC_{50}$  dilution values of ~25,000 and ~1,300 respectively. Both N2 PV were inhibited by anti-N2  
287 antisera, with  $IC_{50}$  dilution values of ~32000 and ~1,300. Similarly, IBV lineage PV were inhibited by  
288 anti-sera tested with  $IC_{50}$  dilution values of ~6300 for B/Vic-like ~ 39,000 for B/Yam-like antisera.

289 IAV H1N1 has caused pandemic influenza in humans, most recently in 2009 (58,59). Taking this into  
290 account, we tested representative N1 PV (A/England/195/2009) inhibition sensitivity to a variety of  
291 monoclonal antibodies (mAb) in pELLA inhibition. As the PV created herein express H11, we tested the  
292 ability of HA stem-directed mAb CR9114 (44), which was previously shown to neutralize IAV and IBV HA PV  
293 (41), to inhibit NA enzymatic activity in a traditional ELLA (60). CR9114 inhibited the N1 PV tested (**Figure**  
294 **3C**) with half maximal inhibitory concentration  $IC_{50}$  of 31.52 ng/mL (**Figure 3E**) as determined by non-linear  
295 regression. As CR9114 inhibits the action of NA via steric hindrance, we also investigated the inhibitory  
296 action of anti-N1 directed antibodies. We tested CD6, a mAb raised against H1N1 2009 pandemic strain of  
297 IAV that binds to an N1 conserved epitope which spans the lateral face of the NA dimer (61). We show  
298 here that our N1 PV (A/England/195/2009) was inhibited by CD6 (**Figure 3C**), with  $IC_{50}$  determined to be  
299 6.13 ng/mL, more potent than CR9114. We also explored inhibition of our 2009 pandemic N1 PV with  
300 anti-N1 mAbs generated against A/Brisbane/59/2007 (42). Monoclonal antibodies 1H5, 4E9, and 3H10  
301 (**Figure 3D**) had  $IC_{50}$  values of 287.80 ng/mL, 133 ng/mL, and 133.90 ng/mL, respectively (**Figure 3E**).  
302 However, mAb 3A2 did not achieve 50% inhibition (**Figure 3D-E**). Reasons for this and the high  
303 concentrations of mAb required, compared to CD6, may be explained by the PV utilized herein being a 2009  
304 pandemic H1N1 strain. The mAb 3A2 was raised against a pre-pandemic strain, suggesting that the 3A2  
305 specific epitope may have been affected by the antigenic shift seen in 2009.

306



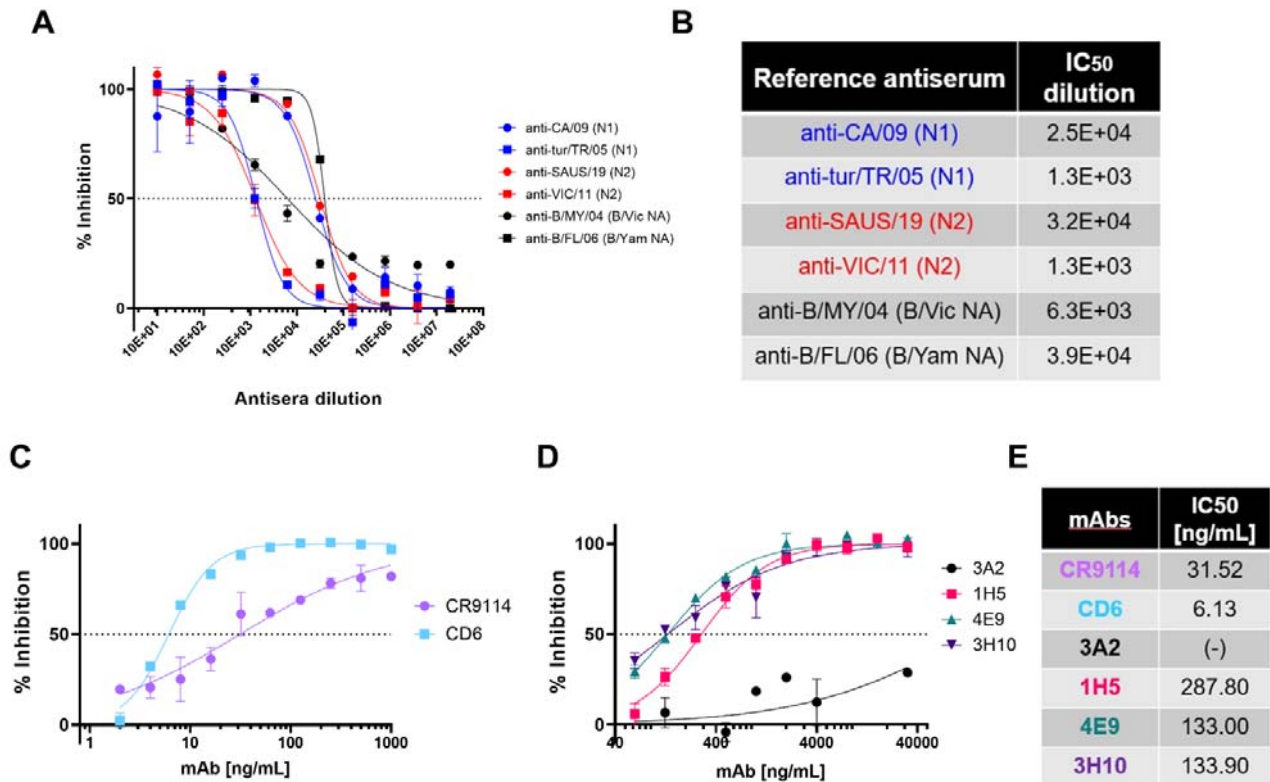

307

308 **Figure 3. *In vitro* inhibition of NA pseudotypes by antisera and monoclonal antibodies. (A)** *In vitro*  
 309 inhibition of representative influenza A and influenza B NA pseudotype virus (PV) which have previously  
 310 caused human infection: N1 (A/England/195/2009), N2 (A/South Australia/34/2019), B/Victoria-like lineage  
 311 NA (B/Colorado/6/2017), and B/Yamagata-like lineage NA (B/Phuket/3073/2013) by reference antisera  
 312 obtained from NIBSC. Reference antisera were serially diluted five-fold from a starting dilution of 1:10 and  
 313 PV diluted to 90% OD<sub>450</sub> as determined previously from titration (**Figure 2C**). Inhibition of NA activity was  
 314 determined via pELLA. Each points represents the mean and standard deviation of two replicates per  
 315 dilution (n=2). **(B)** Half-maximal inhibitory dilution of reference antisera as calculated from dose response  
 316 curves (**A**). **(C)** *In vitro* inhibition of representative N1 (A/England/195/2009) PV by monoclonal antibodies  
 317 CR9114 and CD6. mAbs were diluted two-fold from 1000 ng/mL to 2ng/mL. **(D)** *In vitro* inhibition of  
 318 representative N1 (A/England/195/2009) PV by N1-directed mAbs: 3A2, 1H5, 7E9, and 3H10. mAbs were  
 319 diluted 2-fold from 32 µg/mL to 32 ng/mL. For **(C)** and **(D)**, inhibition was determined via pELLA and each  
 320 points represents the mean and standard deviation of two replicates per dilution (n=2). **(E)** IC<sub>50</sub> concentration  
 321 values as determined from **(C)** and **(D)** using non-linear regression.

322

### 323 3.3 Inhibition of neuraminidase activity by post-NA vaccination mouse sera.

324 We obtained mouse sera from pre-clinical influenza vaccination studies in mice at the University of  
 325 Cambridge and tested the ability of these mouse sera to bind and neutralize H11-NA(X) PV from our library  
 326 representing all IAV subtypes and IBV lineages. Naïve mice were vaccinated with NA (IAV N1-N9 and IBV  
 327 B/Vic and B/Yam) to elicit an immune response against influenza neuraminidase (**Figure 4**). Mouse

328 terminal bleeds were obtained and were assessed via FACS for the capacity to bind to HEK293T/17 cells  
 329 transfected with pEVAC encoding the homologous IAV NA subtype. As expected, high binding activity of  
 330 post-vaccination sera to HEK293T/17 cells expressing the homologous NA was observed with log MFI  
 331 values shown to be  $\geq 4$  (red in the heat map) (**Figure 4A**). Interestingly, sera from mice vaccinated with N2  
 332 and N4, bound to all NA expressed in HEK cells with log MFI values ranging from  $\sim 3$ -4 (**Figure 4A**). Sera  
 333 from mice vaccinated with N5, N6, and N7, displayed little to no binding to all the NA tested, while sera from  
 334 mice vaccinated with N8 and N9 only had strong binding activity against homologous NA expressed in HEK  
 335 cells (**Figure 4A**). Surprisingly, all sera from vaccinated mice showed modest cross-binding activity with  
 336 N9 in HEK cells regardless of NA subtype they were vaccinated with.

337 We then performed pELLA inhibition employing these post-vaccination mouse sera against NA PV  
 338 from our library to assess NA vaccine immunogenicity. All post-vaccination sera neutralized the homologous  
 339 NA subtype (IAV)/lineage (IBV) pseudotype they were tested against with  $IC_{50}$  dilution values ranging from  
 340  $\sim 100$  to  $\sim 10,000$  (**Figure 4B**). These results indicate that post-vaccination immune responses can be  
 341 effectively evaluated using our optimized pELLA.

342  
 343

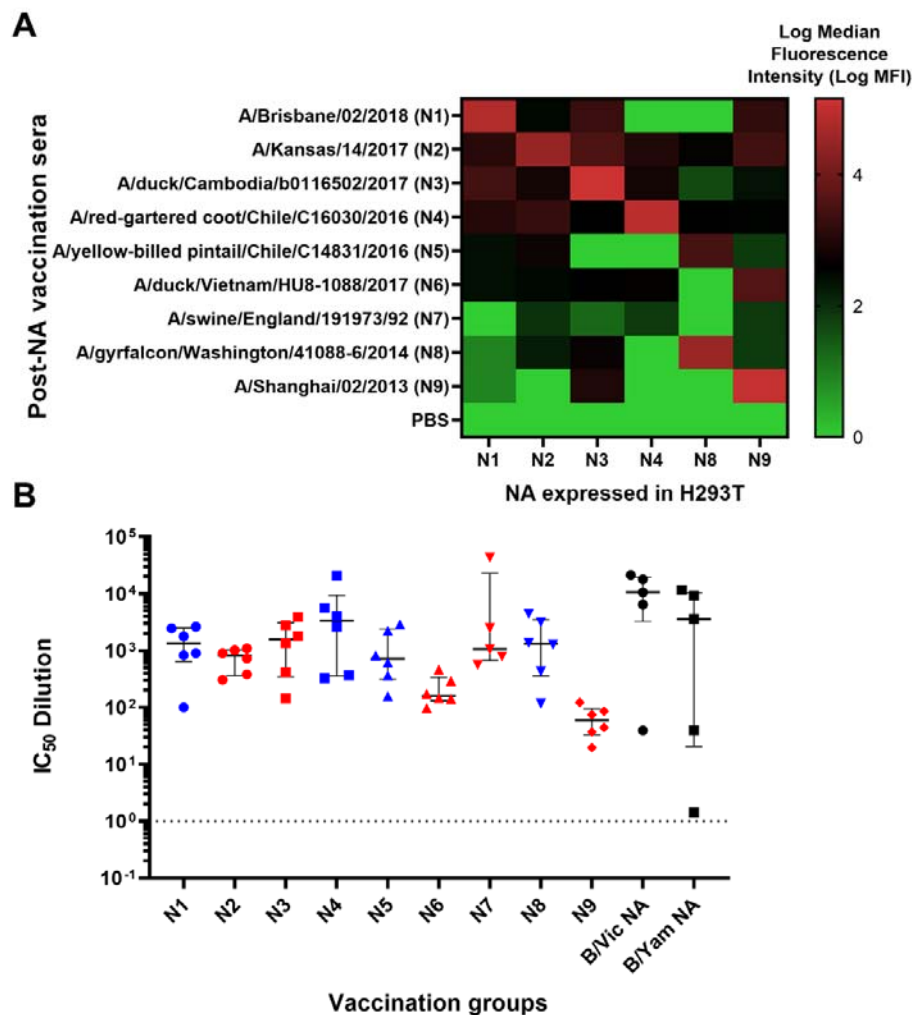

344

345 **Figure 4. Binding and anti-NA activity of post NA vaccination sera.** (A) Binding of representative  
346 post-NA vaccination sera to HEK293T/17 transfected with pEVAC encoding homologous neuraminidase  
347 sequences of N1, N2, N3, N4, N8, and N9, was determined via FACS and reported as Median Fluorescence  
348 Intensity (MFI) in a heatmap. Readings were done in duplicate (n=2). (B) *In vitro* inhibition of  
349 representative IAV (homologous subtype) and IBV (homologous lineage) pseudotypes by mouse sera  
350 vaccinated with Influenza A HA from A/Brisbane/2/18 (N1), A/Kansas/14/17 (N2),  
351 A/duck/Cambodia/b0116502/17 (N3), A/chicken/NSW/1688/1997 (N4), A/yellow-billed  
352 pintail/Chile/C14831/16 (N5), A/yellow-billed teal/Chile/8/13 (N6), A/swine/England/191973/1992 (N7),  
353 A/gyrfalcon/Washington/41088-6/14 (N8), and A/Shanghai/2/13 (N9), and Influenza B HA from  
354 B/Colorado/6/17 (B/Vic) and B/Phuket/3073/13 (B/Yam). Inhibition was determined via pELLA and  
355 reported as IC<sub>50</sub> dilution values (IC<sub>50</sub> is half maximal inhibitory serum dilution). For mice vaccinated with  
356 N1-N6, N8-N9, n=6, for N7 and both B lineages, n=5. Group I NA are indicated in blue and Group II NA in  
357 red. Plot shows the median and interquartile range of all samples tested.

358

359

### 360 **3.4 Comparison of pELLA with NA-Fluor™ to evaluate NA activity and inhibition**

361 We then compared the results of NA activity and inhibition as determined by pELLA to that obtained via  
362 the NA-Fluor™ assay, a commercially available fluorescence linked-MUNANA based assay routinely used  
363 to monitor neuraminidase inhibitor (NI) drug sensitivity.

364 First, we determined the linear range of fluorescence versus concentration of fluorescent  
365 4-Methylumbelliferone (4-MU) of the instrument, the Tecan Infinite 200Pro. 4-MU(SS) is the end product  
366 when the substrate, 20-(4-methylumbelliferyl)-a-D-N-acetylneuraminic acid (MUNANA), is cleaved by NA  
367 (31,62–64). We then selected an RFU value within the linear range of fluorescence detection of the  
368 instrument for normalizing PV according to NA activity (**Supplementary Figure 1**). From these findings  
369 (**Supplementary Figure 1**), we then chose 10,000 RFU (shown via broken line) as the fluorescence signal  
370 output for NA activity normalization (**Figure 5A**). For each PV, we then selected the dilution factor that  
371 yielded 10,000 RFU as identified in the 4-MU(SS) standard curves. Our results show that we have  
372 successfully produced H11-NA(X) PV with neuraminidase activity that is within the linear dynamic range of  
373 detection of the NA-Fluor™ assay that we utilized (**Figure 5A**). These results corroborate the NA activity of  
374 our PV library as determined via pELLA (**Figure 2C**).

375 We then attempted to demonstrate NA inhibition of our representative NA PV by the same reference  
376 antisera and monoclonal antibodies we tested previously in the pELLA (**Figure 3**). Despite employing the  
377 same reference antisera dilutions (**Figure 5B-C**) and mAb concentrations (**Figure 5D-E**), we did not observe  
378 the same inhibition activity against the PV tested in the NA-Fluor™ assay. For the reference antisera, only  
379 the anti-B/FL/06 (B/Yam NA) showed appreciable neutralizing activity against the representative B/Yam NA  
380 PV (**Figure 5B**), however, the IC<sub>50</sub> dilution value determined here (**Figure 5C**) was a log lower from that  
381 observed in the pELLA (**Figure 5B**). The rest of the reference antisera tested did not seem to strongly  
382 inhibit their PV counterparts (**Figure 5B-C**). Similar to the reference antisera, the mAbs specific against N1  
383 that were tested did not inhibit A/England/195/2009 (N1) PV (**Figure 5D-E**), with the data generated  
384 insufficient to calculate IC<sub>50</sub> values (n.c).

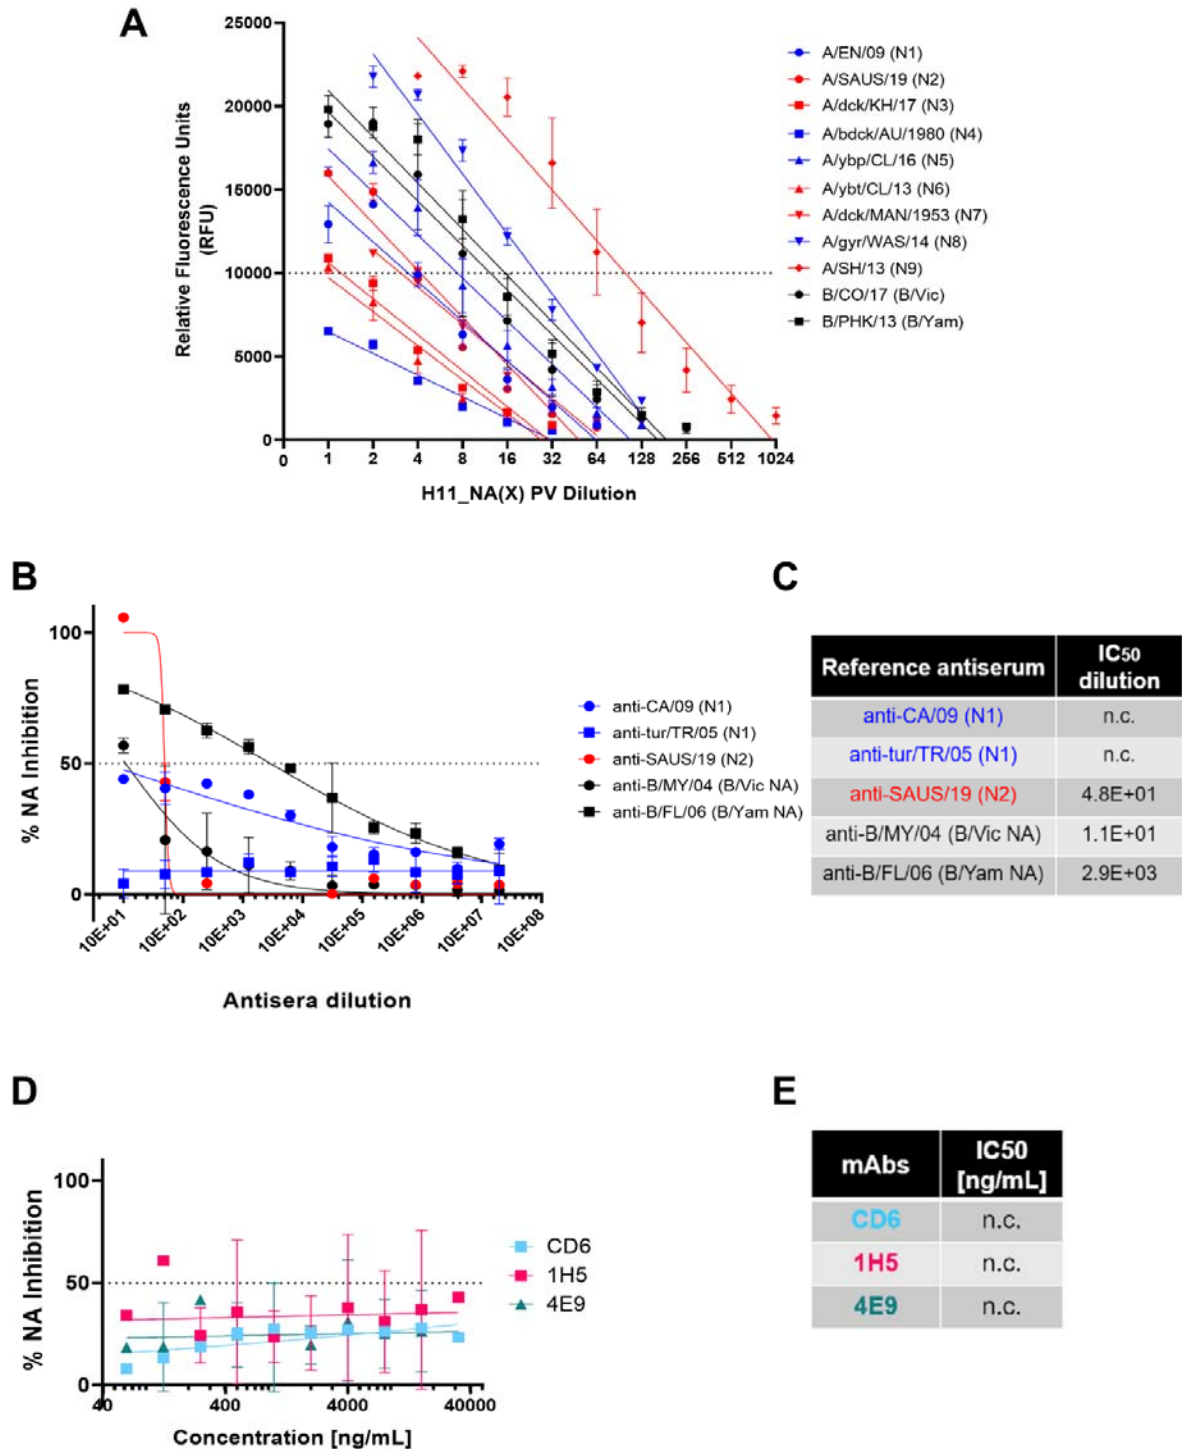

385

386 **Figure 5. Determination of NA activity of H11\_NA pseudotypes and NA inhibition activity of refer-**  
 387 **ence antisera and mAbs via NA Fluor™.** (A) Titration of representative IAV (N1-N9) and IBV  
 388 (B/Victoria-like and B/Yamagata-like lineages) PV. Titers are reported in Relative Fluorescence Units (RFU)  
 389 (n=2). Dotted line at 10,000 RFU indicates value used for NA activity normalization (**Supplementary Figure**  
 390 **1**). (B,C) Inhibition of A/England/195/09 (N1) (blue), A/South Australia/34/19 (N2) (red), IBV (black)  
 391 B/Colorado/6/17 (B/Vic NA) and B/Phuket/3073/13 (B/Yam NA) H11\_NA PV by reference antisera. (B)  
 392 Reference antisera were serially diluted five-fold from a starting dilution of 1:10, similar to **Figure 3A**. NA PV

393 at a dilution that would give 10,000 RFU as determined in (A) was then added to each well. (C) IC<sub>50</sub> dilutions  
394 for reference antisera against homologous subtype/lineage PV are shown. For A-C, Group I NA PV are  
395 shown in blue, Group II NA PV in red, and IBV (both lineages) in black. (D-E) Inhibition of A/England/195/09  
396 (N1) PV by N1-specific monoclonal antibodies. (D) Monoclonal antibodies were serially diluted two-fold  
397 from a starting concentration of 32 µg/mL to 0.0625 ng/mL, and IC<sub>50</sub> values are summarized in (E). For plots (A),  
398 (B), and (D), each point represents the mean and standard deviation of two replicates per dilution. For (C)  
399 and (E), "n.c" indicates values not computed by GraphPad Prism.

400

401 We then compared NA inhibition via pELLA and NA-Fluor™ by post-NA vaccination mouse sera  
402 (Figure 6). We employed the same post-vaccination serum samples and tested using the same PV,  
403 yielding contrasting results. NA neutralization of the N1 and N2 PV employed was successfully  
404 demonstrated using the pELLA for all tests subjects while there was no inhibition observed using the  
405 NA-Fluor™ (Figure 6).

406

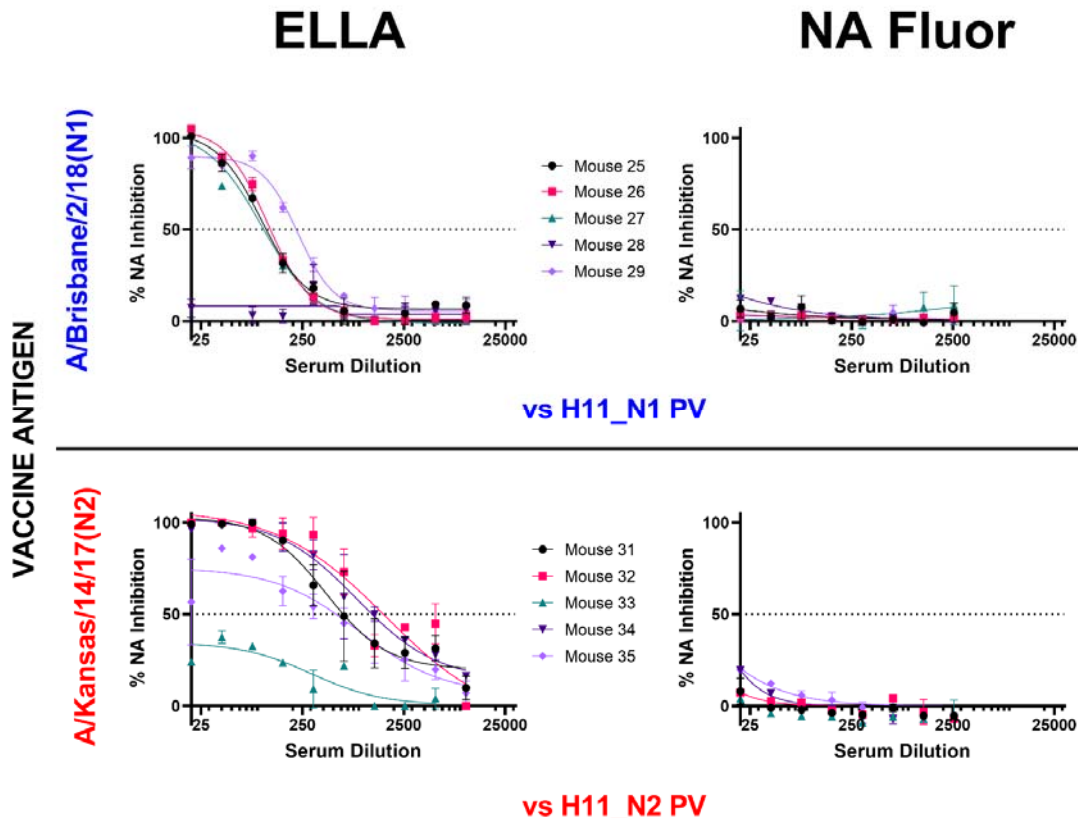

407

408 **Figure 6. Comparison of inhibition of H11\_NA PV by N1 and N2 post-vaccination mouse sera using**  
409 **enzyme linked lectin assay (pELLA) and NA Fluor™.** Sera from mice vaccinated with A/Brisbane/2/18  
410 (N1) (blue) (n=6) and A/Kansas/14/17 (N2) (red) (n=6) were diluted two-fold starting from 1:20 for both  
411 assays. They were then tested for their ability to inhibit homologous NA subtype PV. Percent NA  
412 inhibition is then shown as a function of serum dilution. For all plots, each point represents the mean and  
413 standard deviation of two replicates per dilution.

414

415



#### 416 4. Discussion

417 Development of a Universal Influenza Vaccine relies heavily on the determination of specific immune  
418 responses and other correlates of protection that prevent illness due to influenza infection (26,65,66).  
419 Seasonal influenza vaccination targets the influenza HA head which has been shown in the past to be the  
420 most immunodominant influenza antigen, with NA, the second most abundant influenza surface glycoprotein,  
421 being overlooked until recently (66). Neuraminidase performs multiple functions in the influenza infection  
422 cycle which gives rise to the many possible avenues where antibodies against NA can be exploited to  
423 provide protection against influenza. Similarly to HA, antibodies specific to the conserved regions of NA  
424 have shown excellent breadth and are able to inhibit divergent influenza viruses (60,67).

425 Although limited, knowledge about immunity based on inhibition of NA activity has been building up over  
426 the years. Several clinical studies have successfully shown the importance of the presence of strong  
427 anti-NA inhibition titers (either vaccination-induced or pre-existing through natural infection) in decreasing  
428 the frequency of influenza infection and illness (68–70). These NA inhibition titers (NAI) were found to be  
429 independent of hemagglutination inhibition (HAI) titers, both of which can be used in conjunction to  
430 determine influenza sero-protection (68). These findings warrant further studies on anti-NA immunity by  
431 applying similar methods that allowed us to study anti-HA responses, solidifying NA's important role in  
432 influenza prevention and control.

433 The function of NA and interactions *in vivo* with HA are increasingly being explored especially in relation  
434 to the design and efficacy of novel vaccine or drug candidates. The NA PV library we have constructed can  
435 be utilized to this end in a similar fashion to the HA PV library we previously described (41). Our  
436 comprehensive library has representative strains of IAV N1-11 and IBV B/Vic NA and B/Yam NA  
437 (**Supplementary Table 1**) and the methods used to produce these PV can easily be employed to include  
438 additional NA strains as required. The PV library could be applied to research for human disease with  
439 emphasis on the zoonotic potential of strains such as H10N3 reported recently in China (71) that may have  
440 pandemic potential. We produced NA PV pseudotyped with an HA (in this case, H11) although it was  
441 possible to produce NA PV on its own (**Figure 2A**), as we found that when testing inhibition capacity of  
442 mouse sera, an HA plasmid was required to maintain stability of the PV as observed previously (72) and  
443 reduced background for use in pELLA (34,38). Additionally, this arrangement mirrors the influenza wild  
444 type virus surface that contains both HA and NA, potentially providing a more accurate model for  
445 interactions between these surface glycoproteins that can then be probed at lower containment.

446 All IAV PV (N1-N9) and both lineages of IBV (Victoria-like and Yamagata-like lineages) showed NA  
447 enzymatic activity in our optimized pELLA (**Figure 2C**) suggesting that the PV produced herein have  
448 functional NA sialidase activity. We have also shown that most of the NA we tested were able to release the  
449 H5-NA(X) PV (**Figure 2D**). However, we have reported an unusual case, where A/duck/MAN/1953 (N7) that  
450 had a lower H5 release capacity compared to the other NA tested (**Figure 2D**) has demonstrated strong  
451 neuraminidase activity (**Figure 2C**). This may be because this particular H5 from A/Indonesia/5/2005 has  
452 not been shown to combine in nature with all the NA subtypes tested herein. Furthermore, our data implies  
453 that the role NA plays in HA release (**Figure 2D**) and NA enzymatic activity, as measured via pELLA (**Figure**  
454 **2C**), may be more complex than a direct correlation between enzymatic activity and HA release capacity and  
455 therefore warrants further investigation (73).

456 There is a limited number of subtype specific anti-NA antisera available for testing as there are only very  
457 few NA subtypes that have infected humans in the past, nonetheless, we have shown that the antisera we

458 obtained could inhibit homologous subtype NA activity in the pELLA (**Figure 3A-B**). For mAbs, we utilized  
459 CR9114, a broadly-neutralizing anti-HA stem antibody that binds in a structurally similar manner to the HA  
460 stem region across HA subtypes 1-16, blocking the HA pH-induced conformational changes associated with  
461 membrane fusion (44). HA-stem specific antibodies like CR9114 inhibit NA activity via steric hindrance (60)  
462 and detection of this activity this may be critical for the advancement of universal vaccines which utilize  
463 similar targets (24,74–76). The data we presented (**Figure 3C**) shows CR9114 inhibiting the NA enzymatic  
464 activity of H11-N1 PV, affirming that the pELLA can also be employed to detect this activity similar to  
465 traditional ELLA assays (60). Additionally, we demonstrated that the inhibiting activity of mAbs which directly  
466 target epitopes of NA can also be assessed via this assay (**Figure 3C-D**). Although we only had access to a  
467 limited selection of anti-NA N1 mAbs we have demonstrated that our H1N1 pandemic strain  
468 (A/England/195/2009) was preferentially inhibited by CD6, a mAb raised against H1N1 2009 pandemic  
469 strain (A/California/7/2009) compared to mAbs raised against the seasonal influenza strain  
470 (A/Brisbane/59/2007) (**Figure 3C-D**). These findings concur with previous experiments conducted with  
471 traditional pELLA assays by Wan et al (43).

472 A broadly protective vaccine directed at NA epitopes is becoming an increasingly plausible option.  
473 Previous studies have established that NAI antibody activity is an independent correlate of protection in  
474 humans (69,70). The breadth of immunity due to NA has not been fully elucidated, however a pertinent  
475 example of NA-based immunity can be gleaned from the 1968 H3N2 pandemic. The H3N2 pandemic virus  
476 of 1968 replaced the previous pandemic H2N2 subtype, as the H2 and PB1 gene segments were replaced  
477 by reassortment with an avian-like H3 HA and PB1, with its NA remaining the same (77). This pandemic  
478 H3N2's sporadic nature and milder impact in terms of morbidity and mortality compared to its ancestors in  
479 different regions of the world is hypothesized to be mediated by N2 immunity from the previous pandemic in  
480 all age groups and to the HA antigen in the elderly (17,78,79). Similarly, NA-mediated immunity between  
481 H1N1 and H5N1 viruses has also been observed and this is due to conserved N1 epitopes between these  
482 viruses (24,25,61,67,80). Furthermore, mAbs isolated from H3N2 infected donors which bind directly to the  
483 NA active site have demonstrated exceptional breadth against NA from IAV and IBV and are broadly  
484 protective *in vivo* (81). This indicates a molecular basis for protection, and that these conserved protective  
485 epitopes can be ideal targets for a broadly protective vaccine.

486 We further studied NA-based protection by immunizing groups of mice with different NA subtypes  
487 (N1-N9) and looking for any cross-reactivity that may be present within subtypes. Results were interesting,  
488 as antibodies in post-vaccination mouse sera were able to bind to heterologous NA subtypes (**Figure 4A**)  
489 alluding to the probable presence of conserved epitopes among these subtypes, especially in mice  
490 vaccinated with N1 and N4, which are the closest relatives in the NA Group I phylogenetic tree (**Figure 2B**).  
491 Surprisingly, mouse post-vaccination sera bound to H293T cells expressing N2 and N9 (**Figure 4A**).  
492 Employing pELLA, we were able to successfully quantify NA inhibition in post-vaccination mouse sera, an  
493 indirect measure of antibodies against NA (**Figure 4B**). These findings are the first steps in identifying  
494 conserved regions or epitopes hidden in NA, followed by elucidating the mechanisms by which these NA  
495 antibodies contribute to protection and how these NAI antibody titers may be considered protective.

496 We then compared the results we obtained from pELLA with the NA-Fluor™ Influenza Neuraminidase  
497 Assay Kit. The NA-Fluor™ is a fluorescence-based assay, which quantifies the fluorogenic end product  
498 4-methylumbelliferone released from the non-fluorescent substrate  
499 2'-(4-methylumbelliferyl)- $\alpha$ -D-N-acetylneuraminic acid (MUNANA) by the enzymatic activity of  
500 neuraminidase. The amount of fluorescence directly relates to the amount of enzyme activity. This assay is

501 widely accepted for monitoring of the effect of NA Inhibitors on NA activity or monitoring NI sensitivity in  
502 cell-based virus growth or inhibition assays (26). Employing the NA-Fluor™, we have shown that we  
503 produced H11-NA(X) PV with neuraminidase activity (**Figure 5A**) that can be used in NA-Fluor™ inhibition  
504 assays.

505 It is known that NA activity can be inhibited by antibodies binding directly to epitopes within the enzyme  
506 active site or through steric hindrance when antibodies bind proximal to the active site. However, NI through  
507 steric hindrance can only be observed when larger substrates, such as fetuin, are used, as in ELLA  
508 (81,83–85), and this may not be the case when smaller molecules are used as substrate as in the  
509 NA-Fluor™ and as such, antibodies that do not bind directly to the active site might not inhibit NA activity.  
510 We were also unable to show any NA inhibition activity in post-NA vaccination mouse sera (**Figure 6**), even  
511 if they all strongly inhibited NA as seen via the pELLA (**Figure 4B**). These results are somewhat  
512 disappointing as we could not find any correlation between the two methods and will require further  
513 investigation in the future.

514 Nonetheless, for the first time to our knowledge, we have demonstrated the utility of our optimized PV  
515 enzyme-linked lectin assay (pELLA) employing neuraminidase pseudotyped viruses to evaluate serologic  
516 responses to vaccination with IAV NA1-NA9 and IBV B/Victoria-like and B/Yamagata-like lineage NA. The  
517 pELLA was also useful in determining anti-NA directed monoclonal antibody and anti-NA reference antisera  
518 activity. The assay as it is shown here is more accessible to laboratories without high containment facilities,  
519 and low-resource environments than traditional MUNANA assays. The pELLA was also able to detect NA  
520 inhibition by a variety of samples more effectively than the commercially available NA-Fluor™.

521 Neuraminidase is an important protein which is now recognized to have multiple functions beyond its key  
522 role in viral budding during influenza infection (14) including: preventing aggregation of viral progeny (13),  
523 neutralizing protective effects of human mucus (86), and is capable of replacing functions of HA involved in  
524 viral entry (87–89). In the case of bat IAV, HA uses the major histocompatibility complex (MHC) for entry (55)  
525 and therefore it follows that N10 and N11 have not demonstrated sialidase activity (50–53). Recent data  
526 have shown that N11 is capable of downregulating cell surface expression of MHC-II molecules, the exact  
527 mechanism for this has not yet been elucidated (54). Currently there are several licensed drugs and small  
528 molecules which target NA (90), such as neuraminidase inhibitors (NAI) (91), strongly suggesting that a  
529 vaccine capable of eliciting anti-NA responses would be beneficial to preventing disease from influenza.  
530 Additionally, observations from natural immunity, including the broadly protective mAbs recently described  
531 (81) and a growing number of recombinant NA-based vaccines demonstrating protection in animal models  
532 (24,83,92,93) strengthen the need for further studies of NA as a viable vaccine target. In order to properly  
533 assess the immunity provided by anti-NA vaccines, a toolbox of assays will be required to predict *in vivo*  
534 protective efficacy and establish correlates of protection. We propose that the pELLA system described  
535 herein can form an important part of this new generation of *in vitro* vaccine assessment options. The  
536 flexibility of the PV production process ensures that immunity to a range of subtypes and strains can be  
537 tested against heterologous NA in a format that displays surface glycoproteins in their native conformation.

538  
539

540 **Conflict of Interest:** The authors declare that the research was conducted in the absence of any commercial or finan-  
541 cial relationships that could be construed as a potential conflict of interest

542

543 **Author Contributions:** Conceived and designed experiments – KdC, JMD, GC, MF, NT; Performed experiments –  
544 KdC, JMD, MF, GC; Plasmid construction: SV, BA, RW; Analyzed the data – KdC, JMD, MF, NT; Reagent provision –  
545 RK, NT, JH; Wrote the paper – KdC, JMD, Revised the paper – GC, JH, RW, NT

546

547 **Funding:** NT: KdC and GC receive funding from the Bill and Melinda Gates Foundation: Grand Challenges Universal  
548 Influenza Vaccines Award: Ref: G101404. NT and JMD receive funding from Innovate UK, UK Research and Innova-  
549 tion (UKRI) for the project: Digital Immune Optimized and Selected Pan-Influenza Vaccine Antigens (DIOS-PIVa) Award  
550 Ref: 105078. RW receives funding from EC FETopen (Virofight, Grant 899619).  
551

552 **Acknowledgments:** We would like to thank Jerry Weir of the US Food and Drug Administration (10903 New Hampshire  
553 Avenue, Silver Spring, MD 20993, USA) for the anti-N1 monoclonal antibodies we used in this study.  
554

## 555 5. References

- 556 1. Liu C, Eichelberger M, Compans R, Air G. Influenza type A virus neuraminidase does not play a role in viral  
557 entry, replication, assembly, or budding. *J Virol* (1995) **69**:1099–1106. doi:10.1128/JVI.69.2.1099-1106.1995
- 558 2. Cohen M, Zhang X-Q, Senaati HP, Chen H-W, Varki NM, Schooley RT, Gagneux P. Influenza A penetrates host  
559 mucus by cleaving sialic acids with neuraminidase. *Virology* (2013) **451**:1–13. doi:10.1016/j.virol.2013.05.011
- 560 3. Yang X, Steukers L, Forier K, Xiong R, Braeckmans K, Reeth K Van, Nauwynck H. A Beneficiary Role for  
561 Neuraminidase in Influenza Virus Penetration through the Respiratory Mucus. *PLoS One* (2014) **9**:e110026.  
562 doi:10.1371/JOURNAL.PONE.0110026
- 563 4. Russell CJ, Hu M, Okda FA. Influenza Hemagglutinin Protein Stability, Activation, and Pandemic Risk. *Trends*  
564 *Microbiol* (2018) **26**:841–853. doi:10.1016/j.tim.2018.03.005
- 565 5. Kirkpatrick E, Qiu X, Wilson PC, Bahl J, Krammer F. The influenza virus hemagglutinin head evolves faster than  
566 the stalk domain. *Sci Rep* (2018) **8**: doi:10.1038/s41598-018-28706-1
- 567 6. Shih ACC, Hsiao TC, Ho MS, Li WH. Simultaneous amino acid substitutions at antigenic sites drive influenza A  
568 hemagglutinin evolution. *Proc Natl Acad Sci U S A* (2007) **104**:6283–6288. doi:10.1073/pnas.0701396104
- 569 7. Shtyrya YA, Mochalova LV, Bovin NV. Influenza Virus Neuraminidase: Structure and Function. *Methods Mol*  
570 *Biol* (2009) **1**:26. Available at: /pmc/articles/PMC3347517/ [Accessed July 28, 2021]
- 571 8. Matrosovich MN, Matrosovich TY, Gray T, Roberts NA, Klenk H-D. Human and avian influenza viruses target  
572 different cell types in cultures of human airway epithelium. *Proc Natl Acad Sci U S A* (2004) **101**:4620.  
573 doi:10.1073/PNAS.0308001101
- 574 9. Sriwilaijaroen N, Suzuki Y. Molecular basis of a pandemic of avian-type influenza virus. *Methods Mol Biol* (2014)  
575 **1200**:447–480. doi:10.1007/978-1-4939-1292-6\_38
- 576 10. Kobasa D, Kodihalli S, Luo M, Castrucci M, Donatelli I, Suzuki Y, Suzuki T, Kawaoka Y. Amino acid residues  
577 contributing to the substrate specificity of the influenza A virus neuraminidase. *J Virol* (1999) **73**:6743–6751.  
578 doi:10.1128/JVI.73.8.6743-6751.1999
- 579 11. Gulati U, Wu W, Gulati S, Kumari K, Waner JL, Air GM. Mismatched hemagglutinin and neuraminidase  
580 specificities in recent human H3N2 influenza viruses. *Virology* (2005) **339**:12–20.  
581 doi:10.1016/J.VIROL.2005.05.009
- 582 12. Air G. Influenza neuraminidase. *Influenza Other Respi Viruses* (2012) **6**:245–256.  
583 doi:10.1111/J.1750-2659.2011.00304.X
- 584 13. Palese P, Tobita K, Ueda M, Compans R. Characterization of temperature sensitive influenza virus mutants  
585 defective in neuraminidase. *Virology* (1974) **61**:397–410. doi:10.1016/0042-6822(74)90276-1
- 586 14. Gamblin S, Skehel J. Influenza hemagglutinin and neuraminidase membrane glycoproteins. *J Biol Chem* (2010)  
587 **285**:28403–28409. doi:10.1074/JBC.R110.129809
- 588 15. Webster RG, Laver WG, Air GM, Schild GC. Molecular mechanisms of variation in influenza viruses. *Nat* 1982  
589 **296**:115–121. doi:10.1038/296115a0
- 590 16. Westgeest KB, Graaf M de, Fourment M, Bestebroer TM, Beek R van, Spronken MIJ, Jong JC de,  
591

- 592 Rimmelzwaan GF, Russell CA, Osterhaus ADME, et al. Genetic evolution of the neuraminidase of influenza A  
593 (H3N2) viruses from 1968 to 2009 and its correspondence to haemagglutinin evolution. *J Gen Virol* (2012)  
594 **93**:1996. doi:10.1099/VIR.0.043059-0
- 595 17. Sandbulte MR, Westgeest KB, Gao J, Xu X, Klimov AI, Russell CA, Burke DF, Smith DJ, Fouchier RAM,  
596 Eichelberger MC. Discordant antigenic drift of neuraminidase and hemagglutinin in H1N1 and H3N2 influenza  
597 viruses. *Proc Natl Acad Sci U S A* (2011) **108**:20748–20753. doi:10.1073/pnas.1113801108
- 598 18. Eichelberger M, Morens D, Taubenberger J. Neuraminidase as an influenza vaccine antigen: a low hanging fruit,  
599 ready for picking to improve vaccine effectiveness. *Curr Opin Immunol* (2018) **53**:38–44.  
600 doi:10.1016/J.COI.2018.03.025
- 601 19. Sylte M, Suarez D. Influenza neuraminidase as a vaccine antigen. *Curr Top Microbiol Immunol* (2009)  
602 **333**:227–241. doi:10.1007/978-3-540-92165-3\_12
- 603 20. Hwang HS, Chang M, Kim YA. Influenza–Host Interplay and Strategies for Universal Vaccine Development.  
604 *Vaccines* 2020, Vol 8, Page 548 (2020) **8**:548. doi:10.3390/VACCINES8030548
- 605 21. Paules C, Marston H, Eisinger R, Baltimore D, Fauci AS. The Pathway to a Universal Influenza Vaccine.  
606 *Immunity* (2017) **47**:599–603. doi:10.1016/J.IMMUNI.2017.09.007
- 607 22. Rejmanek D, Hosseini PR, Mazet JAK, Daszak P, Goldstein T. Evolutionary Dynamics and Global Diversity of  
608 Influenza A Virus. *J Virol* (2015) **89**:10993. doi:10.1128/JVI.01573-15
- 609 23. Tsai K, Chen G. Influenza genome diversity and evolution. *Microbes Infect* (2011) **13**:479–488.  
610 doi:10.1016/J.MICINF.2011.01.013
- 611 24. Liu W, Lin C, Tsou Y, Jan J, Wu S. Cross-Reactive Neuraminidase-Inhibiting Antibodies Elicited by  
612 Immunization with Recombinant Neuraminidase Proteins of H5N1 and Pandemic H1N1 Influenza A Viruses. *J*  
613 *Virol* (2015) **89**:7224–7234. doi:10.1128/JVI.00585-15
- 614 25. Job ER, Schotsaert M, Ibañez LI, Smet A, Ysenbaert T, Roose K, Dai M, de Haan CAM, Kleanthous H, Vogel  
615 TU, et al. Antibodies Directed toward Neuraminidase N1 Control Disease in a Mouse Model of Influenza. *J Virol*  
616 (2018) **92**: doi:10.1128/jvi.01584-17
- 617 26. Krammer F, Fouchier RAM, Eichelberger MC, Webby RJ, Shaw-Saliba K, Wan H, Wilson PC, Compans RW,  
618 Skountzou I, Monto AS. NAction! how can neuraminidase-based immunity contribute to better influenza virus  
619 vaccines? *MBio* (2018) **9**: doi:10.1128/mBio.02332-17
- 620 27. Memoli MJ, Shaw PA, Han A, Czajkowski L, Reed S, Athota R, Bristol T, Fargis S, Risos K, Powers JH, et al.  
621 Evaluation of antihemagglutinin and antineuraminidase antibodies as correlates of protection in an influenza  
622 A/H1N1 virus healthy human challenge model. *MBio* (2016) **7**: doi:10.1128/mBio.00417-16
- 623 28. Powers DC, Kilbourne ED, Johansson BE. Neuraminidase-specific antibody responses to inactivated influenza  
624 virus vaccine in young and elderly adults. *Clin Diagn Lab Immunol* (1996) **3**:511. Available at:  
625 /pmc/articles/PMC170398/?report=abstract [Accessed September 14, 2021]
- 626 29. Laguio-Vila MR, Thompson MG, Reynolds S, Spencer SM, Gaglani M, Naleway A, Ball S, Bozeman S, Baker S,  
627 Martínez-Sobrido L, et al. Comparison of serum hemagglutinin and neuraminidase inhibition antibodies after  
628 2010-2011 trivalent inactivated influenza vaccination in healthcare personnel. *Open Forum Infect Dis* (2015) **2**:  
629 doi:10.1093/ofid/ofu115
- 630 30. Klasse PJ, Sattentau QJ. Occupancy and mechanism in antibody-mediated neutralization of animal viruses. *J*  
631 *Gen Virol* (2002) **83**:2091–2108. doi:10.1099/0022-1317-83-9-2091
- 632 31. Potier M, Mameli L, Bélisle M, Dallaire L, Melançon SB. Fluorometric assay of neuraminidase with a sodium  
633 (4-methylumbelliferyl- $\alpha$ -d-N-acetylneuraminate) substrate. *Anal Biochem* (1979) **94**:287–296.  
634 doi:10.1016/0003-2697(79)90362-2



- 635 32. Lambré CR, Chauvaux S, Pilatte Y. Fluorometric assay for the measurement of viral neuraminidase in influenza  
636 vaccines. *Vaccine* (1989) **7**:104–105. doi:10.1016/0264-410X(89)90045-5
- 637 33. Lambré C, Terzidis H, Greffard A, Webster R. Measurement of anti-influenza neuraminidase antibody using a  
638 peroxidase-linked lectin and microtitre plates coated with natural substrates. *J Immunol Methods* (1990)  
639 **135**:49–57. doi:10.1016/0022-1759(90)90255-T
- 640 34. Eichelberger M, Couzens L, Gao Y, Levine M, Katz J, Wagner R, Thompson C, Höschler K, K L, T B, et al.  
641 Comparability of neuraminidase inhibition antibody titers measured by enzyme-linked lectin assay (ELLA) for  
642 the analysis of influenza vaccine immunogenicity. *Vaccine* (2016) **34**:458–465.  
643 doi:10.1016/J.VACCINE.2015.12.022
- 644 35. Gao J, Couzens L, Eichelberger M. Measuring Influenza Neuraminidase Inhibition Antibody Titers by  
645 Enzyme-linked Lectin Assay. *J Vis Exp* (2016) **2016**: doi:10.3791/54573
- 646 36. Piepenbrink M, Nogales A, Basu M, Fucile C, Liesveld J, Keefer M, Rosenberg A, Martinez-Sobrido L, Kobie J.  
647 Broad and Protective Influenza B Virus Neuraminidase Antibodies in Humans after Vaccination and their Clonal  
648 Persistence as Plasma Cells. *MBio* (2019) **10**:1–17. doi:10.1128/MBIO.00066-19
- 649 37. Murtaugh W, Mahaman L, Healey B, Peters H, Anderson B, Tran M, Ziese M, Carlos MP. Evaluation of Three  
650 Influenza Neuraminidase Inhibition Assays for Use in a Public Health Laboratory Setting During the 2011–2012  
651 Influenza Season. *Public Health Rep* (2013) **128**:75. doi:10.1177/00333549131280S212
- 652 38. Biuso F, Carnell G, Montomoli E, Temperton N. A Lentiviral Pseudotype ELLA for the Measurement of  
653 Antibodies Against Influenza Neuraminidase. *BIO-PROTOCOL* (2018) **8**: doi:10.21769/BIOPROTOC.2936
- 654 39. Biuso F, Palladino L, Manenti A, Stanzani V, Lapini G, Gao J, Couzens L, Maryna |, Eichelberger C, Montomoli |  
655 Emanuele. Use of lentiviral pseudotypes as an alternative to reassortant or Triton X-100-treated wild-type  
656 Influenza viruses in the neuraminidase inhibition enzyme-linked lectin assay. (2019) doi:10.1111/irv.12669
- 657 40. Raab D, Graf M, Notka F, Schödl T, Wagner R. The GeneOptimizer Algorithm: using a sliding window approach  
658 to cope with the vast sequence space in multiparameter DNA sequence optimization. *Syst Synth Biol* (2010)  
659 **4**:215–225. doi:10.1007/S11693-010-9062-3
- 660 41. Del Rosario JMM, da Costa KAS, Asbach B, Ferrara F, Ferrari M, Wells DA, Mann GS, Ameh VO, Sabeta CT,  
661 Banyard AC, et al. Exploiting Pan Influenza A and Pan Influenza B Pseudotype Libraries for Efficient Vaccine  
662 Antigen Selection. *Vaccines* (2021) **9**:741. doi:10.3390/VACCINES9070741
- 663 42. Wan H, Gao J, Xu K, Chen H, Couzens LK, Rivers KH, Easterbrook JD, Yang K, Zhong L, Rajabi M, et al.  
664 Molecular Basis for Broad Neuraminidase Immunity: Conserved Epitopes in Seasonal and Pandemic H1N1 as  
665 Well as H5N1 Influenza Viruses. *J Virol* (2013) **87**:9290–9300. doi:10.1128/jvi.01203-13
- 666 43. Wan H, Yang H, Shore D, Garten R, Couzens L, Gao J, Jiang L, Carney P, Villanueva J, Stevens J, et al.  
667 Structural characterization of a protective epitope spanning A(H1N1)pdm09 influenza virus neuraminidase  
668 monomers. *Nat Commun* (2015) **6**:6114. doi:10.1038/NCOMMS7114
- 669 44. Dreyfus C, Laursen NS, Kwaks T, Zuijdgeest D, Khayat R, Ekiert DC, Lee JH, Metlagel Z, Bujny M V.,  
670 Jongeneelen M, et al. Highly Conserved Protective Epitopes on Influenza B Viruses. *Science* (2012) **337**:1343.  
671 doi:10.1126/SCIENCE.1222908
- 672 45. Miller MA, Pfeiffer W, Schwartz T. Creating the CIPRES Science Gateway for inference of large phylogenetic  
673 trees. *2010 Gatew Comput Environ Work GCE 2010* (2010)1–8. doi:10.1109/GCE.2010.5676129
- 674 46. Zhang Y, Aevermann B, Anderson T, Burke D, Dauphin G, Gu Z, He S, Kumar S, Larsen C, Lee A, et al.  
675 Influenza Research Database: An integrated bioinformatics resource for influenza virus research. *Nucleic Acids*  
676 *Res* (2017) **45**:D466–D474. doi:10.1093/NAR/GKW857
- 677 47. Del Rosario JMM, Smith M, Zaki K, Risley P, Temperton N, Engelhardt OG, Collins M, Takeuchi Y, Hufton SE.

- 678 Protection From Influenza by Intramuscular Gene Vector Delivery of a Broadly Neutralizing Nanobody Does Not  
679 Depend on Antibody Dependent Cellular Cytotoxicity. *Front Immunol* (2020) **11**:627.  
680 doi:10.3389/fimmu.2020.00627
- 681 48. Naldini L, Blömer U, Gallay P, Ory D, Mulligan R, Gage F, Verma I, Trono D. In vivo gene delivery and stable  
682 transduction of nondividing cells by a lentiviral vector. *Science* (1996) **272**:263–267.  
683 doi:10.1126/SCIENCE.272.5259.263
- 684 49. Zufferey R, Nagy D, Mandel R, Naldini L, Trono D. Multiply attenuated lentiviral vector achieves efficient gene  
685 delivery in vivo. *Nat Biotechnol* (1997) **15**:871–875. doi:10.1038/NBT0997-871
- 686 50. Zhu X, Yang H, Guo Z, Yu W, Carney PJ, Li Y, Chen LM, Paulson JC, Donis RO, Tong S, et al. Crystal  
687 structures of two subtype N10 neuraminidase-like proteins from bat influenza A viruses reveal a diverged  
688 putative active site. *Proc Natl Acad Sci U S A* (2012) **109**:18903–18908. doi:10.1073/pnas.1212579109
- 689 51. Li Q, Sun X, Li Z, Liu Y, Vavricka CJ, Qi J, Gao GF. Structural and functional characterization of  
690 neuraminidase-like molecule N10 derived from bat influenza A virus. *Proc Natl Acad Sci U S A* (2012)  
691 **109**:18897–18902. doi:10.1073/pnas.1211037109
- 692 52. Tong S, Zhu X, Li Y, Shi M, Zhang J, Bourgeois M, Yang H, Chen X, Recuenco S, Gomez J, et al. New World  
693 Bats Harbor Diverse Influenza A Viruses. *PLoS Pathog* (2013) **9**:e1003657. doi:10.1371/journal.ppat.1003657
- 694 53. Tong S, Li Y, Rivaller P, Conrardy C, Alvarez Castillo DA, Chen LM, Recuenco S, Ellison JA, Davis CT, York IA,  
695 et al. A distinct lineage of influenza A virus from bats. *PNAS* (2012) **109**:4269–4274.  
696 doi:10.1073/pnas.1116200109
- 697 54. Ciminski K, Ran W, Gorka M, Lee J, Malmlov A, Schinköthe J, Eckley M, Murrieta RA, Aboellail TA, Campbell  
698 CL, et al. Bat influenza viruses transmit among bats but are poorly adapted to non-bat species. *Nat Microbiol*  
699 (2019) **4**:2298–2309. doi:10.1038/s41564-019-0556-9
- 700 55. Giotis ES, Carnell G, Young EF, Ghanny S, Soteropoulos P, Wang LF, Barclay WS, Skinner MA, Temperton N.  
701 Entry of the bat influenza H17N10 virus into mammalian cells is enabled by the MHC class II HLA-DR receptor.  
702 *Nat Microbiol* (2019) **4**:2035–2038. doi:10.1038/s41564-019-0517-3
- 703 56. Böttcher-Friebertshäuser E, Garten W, Matrosovich M, Klenk H. The hemagglutinin: a determinant of  
704 pathogenicity. *Curr Top Microbiol Immunol* (2014) **385**:3–34. doi:10.1007/82\_2014\_384
- 705 57. Temperton NJ, Hoschler K, Major D, Nicolson C, Manvell R, Hien VM, Ha DQ, de Jong M, Zambon M, Takeuchi  
706 Y, et al. A sensitive retroviral pseudotype assay for influenza H5N1-neutralizing antibodies. *Influenza Other  
707 Respi Viruses* (2007) **1**:105–112. doi:10.1111/j.1750-2659.2007.00016.x
- 708 58. Taubenberger JK, Morens DM. Influenza: The once and future pandemic. *Public Health Rep* (2010) **125**:15–26.  
709 doi:10.1177/00333549101250s305
- 710 59. Neumann G, Kawaoka Y. Predicting the Next Influenza Pandemics. *J Infect Dis* (2019) **219**:S14–S20.  
711 doi:10.1093/infdis/jjz040
- 712 60. Chen Y-Q, Lan LY-L, Huang M, Henry C, Wilson PC. Hemagglutinin Stalk-Reactive Antibodies Interfere with  
713 Influenza Virus Neuraminidase Activity by Steric Hindrance. *J Virol* (2019) **93**: doi:10.1128/jvi.01526-18
- 714 61. Wan H, Yang H, Shore DA, Garten RJ, Couzens L, Gao J, Jiang L, Carney PJ, Villanueva J, Stevens J, et al.  
715 Structural characterization of a protective epitope spanning A(H1N1)pdm09 influenza virus neuraminidase  
716 monomers. *Nat Commun* (2015) **6**: doi:10.1038/ncomms7114
- 717 62. Eichelberger MC, Hassantoufighi A, Wu M, Li M. Neuraminidase activity provides a practical read-out for a high  
718 throughput influenza antiviral screening assay. *Virol J* 2008 **51** (2008) **5**:1–8. doi:10.1186/1743-422X-5-109
- 719 63. Hassantoufighi A, Zhang H, Sandbulte M, Gao J, Manischewitz J, King L, Golding H, Straight T, Eichelberger M.  
720 A practical influenza neutralization assay to simultaneously quantify hemagglutinin and

- 721 neuraminidase-inhibiting antibody responses. *Vaccine* (2010) **28**:790–797.  
722 doi:10.1016/J.VACCINE.2009.10.066
- 723 64. Leang S, Hurt A. Fluorescence-based Neuraminidase Inhibition Assay to Assess the Susceptibility of Influenza  
724 Viruses to The Neuraminidase Inhibitor Class of Antivirals. *J Vis Exp* (2017) **2017**: doi:10.3791/55570
- 725 65. Sautto GA, Kirchenbaum GA, Ross TM. Towards a universal influenza vaccine: different approaches for one  
726 goal. doi:10.1186/s12985-017-0918-y
- 727 66. Mathew NR, Angeletti D. Recombinant Influenza Vaccines: Saviors to Overcome Immunodominance. *Front*  
728 *Immunol* (2020) **10**:2997. doi:10.3389/fimmu.2019.02997
- 729 67. Rijal P, Wang BB, Tan TK, Schimanski L, Janesch P, Dong T, McCauley JW, Daniels RS, Townsend AR,  
730 Huang K-YA. Broadly Inhibiting Antineuraminidase Monoclonal Antibodies Induced by Trivalent Influenza  
731 Vaccine and H7N9 Infection in Humans. *J Virol* (2020) **94**: doi:10.1128/jvi.01182-19
- 732 68. Park JK, Han A, Czajkowski L, Reed S, Athota R, Bristol T, Rosas LA, Cervantes-Medina A, Taubenberger JK,  
733 Memoli MJ. Evaluation of preexisting anti-hemagglutinin stalk antibody as a correlate of protection in a healthy  
734 volunteer challenge with influenza A/H1N1pdm virus. *MBio* (2018) **9**: doi:10.1128/mBio.02284-17
- 735 69. Couch RB, Atmar RL, Franco LM, Quarles JM, Wells J, Arden N, Niño D, Belmont JW. Antibody correlates and  
736 predictors of immunity to naturally occurring influenza in humans and the importance of antibody to the  
737 neuraminidase. *J Infect Dis* (2013) **207**:974–981. doi:10.1093/infdis/jis935
- 738 70. Monto AS, Petrie JG, Cross RT, Johnson E, Liu M, Zhong W, Levine M, Katz JM, Ohmit SE. Antibody to  
739 influenza virus neuraminidase: An independent correlate of protection. *J Infect Dis* (2015) **212**:1191–1199.  
740 doi:10.1093/infdis/jiv195
- 741 71. WHO. Human infection with avian influenza A(H10N3) – China. (2021) Available at:  
742 [https://www.who.int/emergencies/disease-outbreak-news/item/human-infection-with-avian-influenza-a\(h10n3\)-](https://www.who.int/emergencies/disease-outbreak-news/item/human-infection-with-avian-influenza-a(h10n3)-china)  
743 [china](https://www.who.int/emergencies/disease-outbreak-news/item/human-infection-with-avian-influenza-a(h10n3)-china) [Accessed August 11, 2021]
- 744 72. Chen BJ, Leser GP, Morita E, Lamb RA. Influenza Virus Hemagglutinin and Neuraminidase, but Not the Matrix  
745 Protein, Are Required for Assembly and Budding of Plasmid-Derived Virus-Like Particles. *J Virol* (2007)  
746 **81**:7111–7123. doi:10.1128/jvi.00361-07
- 747 73. Kosik I, Yewdell JW. Influenza hemagglutinin and neuraminidase: Yin–yang proteins coevolving to thwart  
748 immunity. *Viruses* (2019) **11**: doi:10.3390/v11040346
- 749 74. Fukuyama H, Shinnakasu R, Kurosaki T. Influenza vaccination strategies targeting the hemagglutinin stem  
750 region. *Immunol Rev* (2020) **296**:132–141. doi:10.1111/IMR.12887
- 751 75. Margine I, Krammer F, Hai R, Heaton NS, Tan GS, Andrews SA, Runstadler JA, Wilson PC, Albrecht RA,  
752 Garcia-Sastre A, et al. Hemagglutinin Stalk-Based Universal Vaccine Constructs Protect against Group 2  
753 Influenza A Viruses. *J Virol* (2013) **87**:10435–10446. doi:10.1128/jvi.01715-13
- 754 76. Krammer F, Pica N, Hai R, Margine I, Palese P. Chimeric Hemagglutinin Influenza Virus Vaccine Constructs  
755 Elicit Broadly Protective Stalk-Specific Antibodies. *J Virol* (2013) **87**:6542–6550. doi:10.1128/jvi.00641-13
- 756 77. WHO. Avian influenza: assessing the pandemic threat. (2005) Available at:  
757 <https://apps.who.int/iris/handle/10665/68985> [Accessed August 17, 2021]
- 758 78. Viboud C, Grais RF, Lafont BAP, Miller MA, Simonsen L. Multinational impact of the 1968 Hong Kong influenza  
759 pandemic: Evidence for a smoldering pandemic. *J Infect Dis* (2005) **192**:233–248. doi:10.1086/431150
- 760 79. Schulman JL, Kilbourne ED. The antigenic relationship of the neuraminidase of Hong Kong virus to that of other  
761 human strains of influenza A virus. *Bull World Health Organ* (1969) **41**:425–428. Available at:  
762 </pmc/articles/PMC2427752/?report=abstract> [Accessed August 17, 2021]
- 763 80. Easterbrook JD, Schwartzman LM, Gao J, Kash JC, Morens DM, Couzens L, Wan H, Eichelberger MC,

- 764 Taubenberger JK. Protection against a lethal H5N1 influenza challenge by intranasal immunization with  
765 virus-like particles containing 2009 pandemic H1N1 neuraminidase in mice. *Virology* (2012) **432**:39–44.  
766 doi:10.1016/j.virol.2012.06.003
- 767 81. Stadlbauer D, Zhu X, McMahon M, Turner JS, Wohlbold TJ, Schmitz AJ, Strohmeier S, Yu W, Nachbagauer R,  
768 Mudd PA, et al. Broadly protective human antibodies that target the active site of influenza virus neuraminidase.  
769 *Science* (80- ) (2019) **366**:499–504. doi:10.1126/science.aay0678
- 770 82. Eichelberger MC, Monto AS. Neuraminidase, the Forgotten Surface Antigen, Emerges as an Influenza Vaccine  
771 Target for Broadened Protection. *J Infect Dis* (2019) **219**:S75–S80. doi:10.1093/infdis/jiz017
- 772 83. Wohlbold TJ, Podolsky KA, Chromikova V, Kirkpatrick E, Falconieri V, Meade P, Amanat F, Tan J, Tenoever BR,  
773 Tan GS, et al. Broadly protective murine monoclonal antibodies against influenza B virus target highly  
774 conserved neuraminidase epitopes. *Nat Microbiol* (2017) **2**:1415–1424. doi:10.1038/s41564-017-0011-8
- 775 84. Wetherall NT, Trivedi T, Zeller J, Hodges-Savola C, McKimm-Breschkin JL, Zambon M, Hayden FG. Evaluation  
776 of neuraminidase enzyme assays using different substrates to measure susceptibility of influenza virus clinical  
777 isolates to neuraminidase inhibitors: Report of the neuraminidase inhibitor susceptibility network. *J Clin*  
778 *Microbiol* (2003) **41**:742–750. doi:10.1128/JCM.41.2.742-750.2003
- 779 85. Chen YQ, Wohlbold TJ, Zheng NY, Huang M, Huang Y, Neu KE, Lee J, Wan H, Rojas KT, Kirkpatrick E, et al.  
780 Influenza Infection in Humans Induces Broadly Cross-Reactive and Protective Neuraminidase-Reactive  
781 Antibodies. *Cell* (2018) **173**:417–429.e10. doi:10.1016/j.cell.2018.03.030
- 782 86. Cohen M, Zhang XQ, Senaati HP, Chen HW, Varki NM, Schooley RT, Gagneux P. Influenza A penetrates host  
783 mucus by cleaving sialic acids with neuraminidase. *Virology* (2013) **10**:1–13. doi:10.1186/1743-422X-10-321
- 784 87. Gulati S, Smith DF, Cummings RD, Couch RB, Griesemer SB, George K St., Webster RG, Air GM. Human  
785 H3N2 Influenza Viruses Isolated from 1968 To 2012 Show Varying Preference for Receptor Substructures with  
786 No Apparent Consequences for Disease or Spread. *PLoS One* (2013) **8**:e66325.  
787 doi:10.1371/JOURNAL.PONE.0066325
- 788 88. Laver WG, Colman PM, Webster RG, Hinshaw VS, Air GM. Influenza virus neuraminidase with hemagglutinin  
789 activity. *Virology* (1984) **137**:314–323. doi:10.1016/0042-6822(84)90223-X
- 790 89. Lin YP, Gregory V, Collins P, Kloess J, Wharton S, Cattle N, Lackenby A, Daniels R, Hay A. Neuraminidase  
791 Receptor Binding Variants of Human Influenza A(H3N2) Viruses Resulting from Substitution of Aspartic Acid  
792 151 in the Catalytic Site: a Role in Virus Attachment? *J Virol* (2010) **84**:6769–6781. doi:10.1128/jvi.00458-10
- 793 90. Hurt AC. Antiviral therapy for the next influenza pandemic. *Trop Med Infect Dis* (2019) **4**:  
794 doi:10.3390/tropicalmed4020067
- 795 91. Dobson J, Whitley RJ, Pocock S, Monto AS. Oseltamivir treatment for influenza in adults: A meta-analysis of  
796 randomised controlled trials. *Lancet* (2015) **385**:1729–1737. doi:10.1016/S0140-6736(14)62449-1
- 797 92. Smith GE, Sun X, Bai Y, Liu Y V., Massare MJ, Pearce MB, Belser JA, Maines TR, Creager HM, Glenn GM, et  
798 al. Neuraminidase-based recombinant virus-like particles protect against lethal avian influenza A(H5N1) virus  
799 infection in ferrets. *Virology* (2017) **509**:90–97. doi:10.1016/j.virol.2017.06.006
- 800 93. McMahon M, Kirkpatrick E, Stadlbauer D, Strohmeier S, Bouvier NM, Krammer F. Mucosal immunity against  
801 neuraminidase prevents influenza B virus transmission in Guinea pigs. *MBio* (2019) **10**:  
802 doi:10.1128/mBio.00560-19

804  
805

## 6. Supplementary Material

806

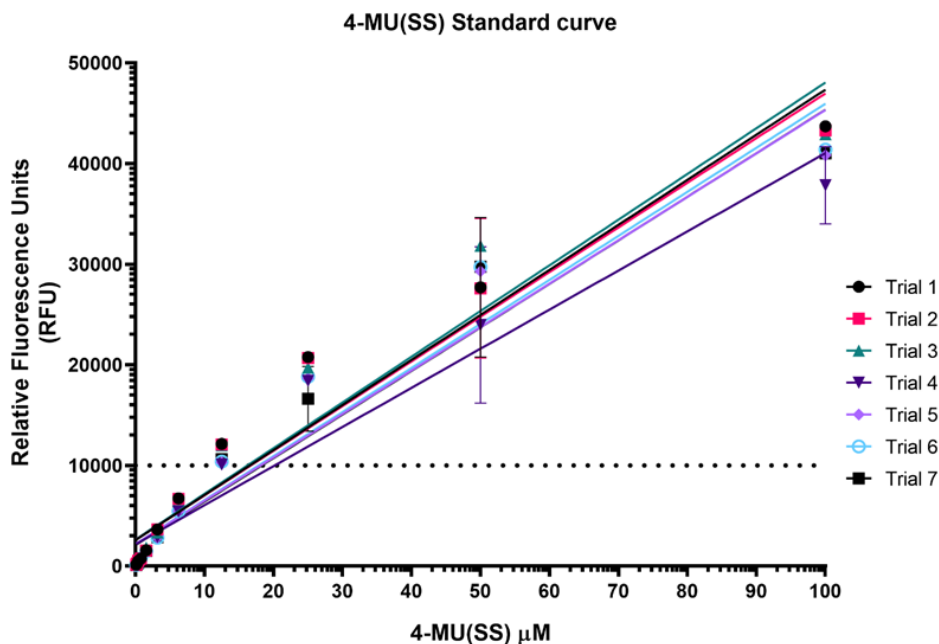

807

808 **Supplementary Figure 1. Standard Curve of 4-Methylumbelliferone sodium salt (4-MU(SS)).** A  
809 standard curve was generated with different concentrations of 4-MU(SS) corresponding to a range of RFU  
810 values as read via the Tecan Infinite 200Pro fluorescence plate reader at excitation and emission  
811 wavelengths of 350 nm and 440 nm respectively ( $n=7$ ). The Neuraminidase (NA) activity/RFU range for the  
812 NA inhibition assay was determined using the linear range of the 4-MU(SS) standard curve. We have  
813 arbitrarily chosen  $\sim 12 \mu\text{M}$  4-MU(SS) corresponding to  $\sim 10,000$  RFU (broken line) to normalize the NA  
814 activities of each PV for use in the NA-Fluor™ NA inhibition assay.

815

816

817

818

819

820

821

822

823

824

825

826

827

828



829

830

831 **Supplementary Table 1.** List of influenza neuraminidase pseudotypes (PV) available at the Viral  
 832 Pseudotype Unit, University of Kent.

| NA Subtype | Strain                                    | Accession # | Plasmid |
|------------|-------------------------------------------|-------------|---------|
| N1         | A/Puerto Rico/8/1934                      | CY033579    | pI.18   |
|            | A/California/7/2009                       | KU933487.1  | pI.18   |
|            | A/England/195/2009                        | GQ166659    | pEVAC   |
|            | A/Brisbane/2/2018                         | EPI1312565  | pEVAC   |
|            | A/swine/England/1353/2009                 | EPI640886   | pEVAC   |
|            | A/swine/NorthCarolina/A02478985/2020      | MT020063    | pEVAC   |
| N2         | A/Udom/307/1972                           | M879361.1   | pI.18   |
|            | A/Japan/WRAIR1059P/2008(N2)               | EPI275488   | pEVAC   |
|            | A/Korea/KUMC-GR570/2011(N2)               | MF441137    | pEVAC   |
|            | A/Texas/50/2012                           | KC892281.1  | pI.18   |
|            | A/chicken/Vietnam/HU3-373/2015            | LC426788    | pEVAC   |
|            | A/Kansas/14/2017                          | EPI1146344  | pEVAC   |
|            | A/Switzerland/8060/2017 (N2)              | EPI1326014  | pEVAC   |
|            | A/SouthAustralia/34/2019 (N2)             | EPI1607116  | pEVAC   |
|            | A/chicken/Laos/DC4365/2020                | EPI1851379  | pEVAC   |
| N3         | A/tern/Astrakhan/775/83                   | AY207523    | pEVAC   |
|            | A/kelp gull/Chile/C10791/2016 (N3)        | MH134604    | pEVAC   |
|            | A/duck/Cambodia/b0116502/2017             | MG591686    | pEVAC   |
| N4         | A/chicken/NSW/1688/1997                   | GU053088    | pEVAC   |
|            | A/red-gartered coot/Chile/C16030/2016     | MH675631    | pEVAC   |
| N5         | A/black duck/AUS/4045/1980                | CY005693    | pEVAC   |
|            | A/yellow-billed pintail/Chile/C14831/2016 | MH134707    | pEVAC   |
| N6         | A/yellow-billed teal/Chile/8/2013         | KX101151    | pEVAC   |

|          |                                            |            |       |
|----------|--------------------------------------------|------------|-------|
|          | A/duck/Vietnam/HU8-1088/2017(N6)           | LC427549   | pEVAC |
|          | A/Anhui/2021-00011/2020                    | EPI1848297 | pEVAC |
|          | A/duck/NgheAn/5382VTC/2019                 | EPI1665322 | pEVAC |
| N7       | A/duck/Manitoba/1953                       | KF435051   | pEVAC |
|          | A/swine/England/191973/1992                | U85988     | pEVAC |
| N8       | A/gyrfalcon/Washington/41088-6/2014 (N8)   | EPI569392  | pEVAC |
| N9       | A/Shanghai/2/2013                          | EPI448938  | pEVAC |
|          | A/Gansu/23275/2019                         | EPI1431607 | pEVAC |
| N10      | A/Little shouldered bat/Guatemala/060/2011 | CY103894.1 | pI.18 |
| N11      | A/flat-faced bat/Peru/033/2010             | CY125947   | pEVAC |
| B/Vic NA | B/Colorado/6/2017                          | EPI969379  | pEVAC |
|          | B/Washington/2/2019                        | EPI1368872 | pEVAC |
| B/Yam NA | B/Phuket/3073/2013                         | EPI1349898 | pEVAC |

833
